# Supplementary material for: Effectiveness of green health prescribing and nature-based interventions in primary care and community setting for older adults – A systematic review
Source: Research Square preprint supplement (doi:10.21203/rs.3.rs-8733410/v1), 2026-02-13

**Additional files**

**Effectiveness of green health prescribing and nature-based interventions in primary care and community setting for older adults – A systematic review**

Additional file 1: PRISMA abstract checklist

Additional file 2: PRISMA checklist

Additional file 3:  SwiM checklist

Additional file 4: PPI GRIPP-2 Reporting table (Short version)

Additional file  5: Search strategy (all sources)

Additional file  6: Outcome categories

Additional file  7: Characteristics of effectiveness studies

Additional file  8: Results of quality assessment using MMAT

Additional file 9: Study findings - effectiveness of activities in nature

Additional file  10: Study findings – effectiveness of green space exercise interventions

Additional file  11: Study findings – effectiveness of indoor gardening

Additional file 12: Study findings – effectiveness of horticultural interventions

Figure 1: Logic model

**Appendix 1: PRISMA abstract checklist**

| **Section and Topic** | **Item #** | **Checklist item** | **Reported (Yes/No)** |
| --- | --- | --- | --- |
| **TITLE** | | |  |
| Title | 1 | Identify the report as a systematic review. | Page 1 |
| **BACKGROUND** | | |  |
| Objectives | 2 | Provide an explicit statement of the main objective(s) or question(s) the review addresses. | Page 2 |
| **METHODS** | | |  |
| Eligibility criteria | 3 | Specify the inclusion and exclusion criteria for the review. | Page 2 |
| Information sources | 4 | Specify the information sources (e.g. databases, registers) used to identify studies and the date when each was last searched. | Page 2 |
| Risk of bias | 5 | Specify the methods used to assess risk of bias in the included studies. |  |
| Synthesis of results | 6 | Specify the methods used to present and synthesise results. | Page 2 |
| **RESULTS** | | |  |
| Included studies | 7 | Give the total number of included studies and participants and summarise relevant characteristics of studies. | Page 3 |
| Synthesis of results | 8 | Present results for main outcomes, preferably indicating the number of included studies and participants for each. If meta-analysis was done, report the summary estimate and confidence/credible interval. If comparing groups, indicate the direction of the effect (i.e. which group is favoured). | Page 3 |
| **DISCUSSION** | | |  |
| Limitations of evidence | 9 | Provide a brief summary of the limitations of the evidence included in the review (e.g. study risk of bias, inconsistency and imprecision). | Page 3 |
| Interpretation | 10 | Provide a general interpretation of the results and important implications. | Page 3 |
| **OTHER** | | |  |
| Funding | 11 | Specify the primary source of funding for the review. |  |
| Registration | 12 | Provide the register name and registration number. | Page 3 |

*From:*  Page MJ, McKenzie JE, Bossuyt PM, Boutron I, Hoffmann TC, Mulrow CD, et al. The PRISMA 2020 statement: an updated guideline for reporting systematic reviews. BMJ 2021;372:n71. doi: 10.1136/bmj.n71. This work is licensed under CC BY 4.0. To view a copy of this license, visit <https://creativecommons.org/licenses/by/4.0/>

**Appendix 2: PRISMA checklist**

| **Section and Topic** | **Item #** | **Checklist item** | **Location where item is reported** |
| --- | --- | --- | --- |
| **TITLE** | | |  |
| Title | 1 | Identify the report as a systematic review. | Page 1 |
| **ABSTRACT** | | |  |
| Abstract | 2 | See the PRISMA 2020 for Abstracts checklist. |  |
| **INTRODUCTION** | | |  |
| Rationale | 3 | Describe the rationale for the review in the context of existing knowledge. | Page 5 |
| Objectives | 4 | Provide an explicit statement of the objective(s) or question(s) the review addresses. | Page 6 |
| **METHODS** | | |  |
| Eligibility criteria | 5 | Specify the inclusion and exclusion criteria for the review and how studies were grouped for the syntheses. | Page 7 |
| Information sources | 6 | Specify all databases, registers, websites, organisations, reference lists and other sources searched or consulted to identify studies. Specify the date when each source was last searched or consulted. |  |
| Search strategy | 7 | Present the full search strategies for all databases, registers and websites, including any filters and limits used. | Page 8 |
| Selection process | 8 | Specify the methods used to decide whether a study met the inclusion criteria of the review, including how many reviewers screened each record and each report retrieved, whether they worked independently, and if applicable, details of automation tools used in the process. | Page 9 |
| Data collection process | 9 | Specify the methods used to collect data from reports, including how many reviewers collected data from each report, whether they worked independently, any processes for obtaining or confirming data from study investigators, and if applicable, details of automation tools used in the process. | Page 9 |
| Data items | 10a | List and define all outcomes for which data were sought. Specify whether all results that were compatible with each outcome domain in each study were sought (e.g. for all measures, time points, analyses), and if not, the methods used to decide which results to collect. | Page 9 |
| 10b | List and define all other variables for which data were sought (e.g. participant and intervention characteristics, funding sources). Describe any assumptions made about any missing or unclear information. | Page 9 |
| Study risk of bias assessment | 11 | Specify the methods used to assess risk of bias in the included studies, including details of the tool(s) used, how many reviewers assessed each study and whether they worked independently, and if applicable, details of automation tools used in the process. | Page 10 |
| Effect measures | 12 | Specify for each outcome the effect measure(s) (e.g. risk ratio, mean difference) used in the synthesis or presentation of results. | Page 10 |
| Synthesis methods | 13a | Describe the processes used to decide which studies were eligible for each synthesis (e.g. tabulating the study intervention characteristics and comparing against the planned groups for each synthesis (item #5)). | Page 10-12 |
| 13b | Describe any methods required to prepare the data for presentation or synthesis, such as handling of missing summary statistics, or data conversions. | Page 10-12 |
| 13c | Describe any methods used to tabulate or visually display results of individual studies and syntheses. | NA |
| 13d | Describe any methods used to synthesize results and provide a rationale for the choice(s). If meta-analysis was performed, describe the model(s), method(s) to identify the presence and extent of statistical heterogeneity, and software package(s) used. | Page 10-12 |
| 13e | Describe any methods used to explore possible causes of heterogeneity among study results (e.g. subgroup analysis, meta-regression). | Page 10-12 |
| 13f | Describe any sensitivity analyses conducted to assess robustness of the synthesized results. | 10-12 |
| Reporting bias assessment | 14 | Describe any methods used to assess risk of bias due to missing results in a synthesis (arising from reporting biases). | NA |
| Certainty assessment | 15 | Describe any methods used to assess certainty (or confidence) in the body of evidence for an outcome. | Page 10 |
| **RESULTS** | | |  |
| Study selection | 16a | Describe the results of the search and selection process, from the number of records identified in the search to the number of studies included in the review, ideally using a flow diagram. | Page 14 |
| 16b | Cite studies that might appear to meet the inclusion criteria, but which were excluded, and explain why they were excluded. | Page 14 |
| Study characteristics | 17 | Cite each included study and present its characteristics. | Page 14 |
| Risk of bias in studies | 18 | Present assessments of risk of bias for each included study. | Page 14 |
| Results of individual studies | 19 | For all outcomes, present, for each study: (a) summary statistics for each group (where appropriate) and (b) an effect estimate and its precision (e.g. confidence/credible interval), ideally using structured tables or plots. | Page 15-25 |
| Results of syntheses | 20a | For each synthesis, briefly summarise the characteristics and risk of bias among contributing studies. | Page 15-25 |
| 20b | Present results of all statistical syntheses conducted. If meta-analysis was done, present for each the summary estimate and its precision (e.g. confidence/credible interval) and measures of statistical heterogeneity. If comparing groups, describe the direction of the effect. | Page 15-25 |
| 20c | Present results of all investigations of possible causes of heterogeneity among study results. | NA |
| 20d | Present results of all sensitivity analyses conducted to assess the robustness of the synthesized results. | NA |
| Reporting biases | 21 | Present assessments of risk of bias due to missing results (arising from reporting biases) for each synthesis assessed. | Page 15-25 |
| Certainty of evidence | 22 | Present assessments of certainty (or confidence) in the body of evidence for each outcome assessed. | Page 15-25 |
| **DISCUSSION** | | |  |
| Discussion | 23a | Provide a general interpretation of the results in the context of other evidence. | Page 26-27 |
| 23b | Discuss any limitations of the evidence included in the review. | Page 28-30 |
| 23c | Discuss any limitations of the review processes used. | Page 29 |
| 23d | Discuss implications of the results for practice, policy, and future research. | Page 30-31 |
| **OTHER INFORMATION** | | |  |
| Registration and protocol | 24a | Provide registration information for the review, including register name and registration number, or state that the review was not registered. | Page 7 |
| 24b | Indicate where the review protocol can be accessed, or state that a protocol was not prepared. | Page 7 |
| 24c | Describe and explain any amendments to information provided at registration or in the protocol. | Page 7 |
| Support | 25 | Describe sources of financial or non-financial support for the review, and the role of the funders or sponsors in the review. | Page 37 |
| Competing interests | 26 | Declare any competing interests of review authors. | Page 37 |
| Availability of data, code and other materials | 27 | Report which of the following are publicly available and where they can be found: template data collection forms; data extracted from included studies; data used for all analyses; analytic code; any other materials used in the review. | Page 38-39 |

*From:*  Page MJ, McKenzie JE, Bossuyt PM, Boutron I, Hoffmann TC, Mulrow CD, et al. The PRISMA 2020 statement: an updated guideline for reporting systematic reviews. BMJ 2021;372:n71. doi: 10.1136/bmj.n71. This work is licensed under CC BY 4.0. To view a copy of this license, visit <https://creativecommons.org/licenses/by/4.0/>

**Appendix 3: SwiM checklist**

The citation for the Synthesis Without Meta-analysis explanation and elaboration article is: Campbell M, McKenzie JE, Sowden A, Katikireddi SV, Brennan SE, Ellis S, Hartmann-Boyce J, Ryan R, Shepperd S, Thomas J, Welch V, Thomson H. Synthesis without meta-analysis (SWiM) in systematic reviews: reporting guideline BMJ 2020;368:l6890 <http://dx.doi.org/10.1136/bmj.l6890>

|  | | | |
| --- | --- | --- | --- |
| **SWiM reporting item** | **Item description** | **Page in manuscript where item is reported** | **Other*** |
| *Methods* | | | |
| **1**Grouping studies for synthesis | 1a) Provide a description of, and rationale for, the groups used in the synthesis (e.g., groupings of populations, interventions, outcomes, study design) | 10-11 |  |
| 1b) Detail and provide rationale for any changes made subsequent to the protocol in the groups used in the synthesis | NA |  |
| **2** Describe the standardised metric and transformation methods used | Describe the standardised metric for each outcome. Explain why the metric(s) was chosen, and describe any methods used to transform the intervention effects, as reported in the study, to the standardised metric, citing any methodological guidance consulted | NA |  |
| **3** Describe the synthesis methods | Describe and justify the methods used to synthesise the effects for each outcome when it was not possible to undertake a meta-analysis of effect estimates | 11-12 |  |
| **4**Criteria used to prioritise results for summary and synthesis | Where applicable, provide the criteria used, with supporting justification, to select the particular studies, or a particular study, for the main synthesis or to draw conclusions from the synthesis (e.g., based on study design, risk of bias assessments, directness in relation to the review question) | 10-11 |  |
| **5** Investigation of heterogeneity in reported effects | State the method(s) used to examine heterogeneity in reported effects when it was not possible to undertake a meta-analysis of effect estimates and its extensions to investigate heterogeneity | NR |  |
| **6**Certainty of evidence | Describe the methods used to assess certainty of the synthesis findings | 10 |  |
| **7** Data presentation methods | Describe the graphical and tabular methods used to present the effects (e.g., tables, forest plots, harvest plots).  Specify key study characteristics (e.g., study design, risk of bias) used to order the studies, in the text and any tables or graphs, clearly referencing the studies included | 10 |  |
| *Results* | | | |
| **8**Reporting results | For each comparison and outcome, provide a description of the synthesised findings, and the certainty of the findings. Describe the result in language that is consistent with the question the synthesis addresses, and indicate which studies contribute to the synthesis | 15-25, Tables 2-5  Appendices 9-12 |  |
| *Discussion* |  |  |  |
| **9** Limitations of the synthesis | Report the limitations of the synthesis methods used and/or the groupings used in the synthesis, and how these affect the conclusions that can be drawn in relation to the original review question | 27 |  |

PRISMA=Preferred Reporting Items for Systematic Reviews and Meta-Analyses.

*If the information is not provided in the systematic review, give details of where this information is available (e.g., protocol, other published papers (provide citation details), or website (provide the URL)).

**Appendix 4: PPI GRIPP-2 Reporting table (Short version)**

| **Section and topic** | **Item** | **Reported on page no.** |
| --- | --- | --- |
| 1: Aim: Report the aim of the study | To conduct a systematic review, reporting the health and social benefits of green health prescribing (GHP) or nature-based interventions compared to standard care The aim of the co production group was to collectively gather feedback on people’s experience, perspectives and viewpoints of prescribing NBIs and undertaking nature-based interventions. This helped build our review, incorporating the experiences and perspectives from prescribers, service providers and service users in our organisation and interpretation of evidence. | 7 |
| 2: Methods: Provide a clear description of the methods used for PPI in the study | We tried to establish a PPI group which would allow us to understand the experiences, perceptions and concerns of both the service users and service providers with regard to GHP and/or nature-based interventions in real practice. Through internet searches and our own research network, we identified a few organisations which may have been involved in the provision of green health prescribing services in the UK. We contacted them initially by e-mails to introduce our project and explain our purposes for establishing the PPI group. This was followed by phone calls or online meetings, during which we confirmed their willingness to join the PPI group and asked if they could connect us with potential service users who would show an interest in being part of the PPI group.    Eventually we recruited six PPI group members which consisted of a general practitioner (GP) and two service providers who have been involved in running a GHP related organisation and/or leading GHP related activities, and three service users who had experience in receiving and utilising nature-based interventions. PPI group members received information about the review and preliminary results in a series of meetings and shared their perspectives and practical experience with the review them. They critiqued/commented on the applicability of study findings, sense-checked our presentation/interpretation of findings​ and helped develop our logic model by sharing their lived experience.    We discussed a range of areas that included key questions or ideas about GHP (Green health prescriptions) in between meetings to help collate the perspectives of the co-production group. The group provided experiential evidence, commenting and advising on the emerging data extracted from the evidence review, thus influencing the review process (data extraction, resolving uncertainties, and data interpretation stage) to ensure a wider awareness of the contextual factors that can impact on the delivery of green prescribing. | 7 |
| 3: Study results: Outcomes – Report the study results of PPI in the study, including both positive and negative outcomes | They highlighted the complexity in creating simple systems of co-design/production within GHP as it was a relatively new concept. Additionally, it was reported that social prescribing overall appears to be irrelevant to mainstream health professionals due to the systemic, practical and knowledge-based factors. Suggestions were made to empower patients in a leading role in their care; make GHP authentic and real; and involve more participants. Ideas were suggested to provide documents that validate service users’ experiences with health professionals based on the benefits they have gained. This can transform GHP participants’ anecdotal feeling into recognised, concrete evidence in the form of patient reported outcomes.    Key themes and connotations were identified. service providers highlighted some potential barriers of GHP. Patient centred experience was brought up in the meeting, with both patient’s understanding and clinician’s understanding of GHP being potentially limited. GP’s consultation skills in delivering green prescriptions were acknowledged as barrier. Funding and sustainability of prescribed interventions was remarked, as to whether there is a guarantee that the full intervention is going to be completed. The effect and impact of GHP is believed to be influenced by patients’ behaviour, addressing the importance of the behaviour change theoretical framework in designing and implementing the interventions. A key observation addressed in the meeting was the issue of socioeconomic disparities that may have a huge influence on the effectiveness of GHP. A key term used by a GP was ‘deep end practices’, which refers to general practices serving communities that experience the highest levels of socio-economic deprivation (bottom 1% socio-economic status). This is closely aligned with our research as to how GHP will serve those communities and whether it is practical for them. Our GP highlighted that patients from these particular communities are often engaged with other issues in life which are perceived as a priority in comparison to having the time and finance to improve their health. Therefore, it may be difficult to engage patients with GHP in practices within those deprived areas without addressing some of those more complex needs, which are the underlying issues.    Service users showed a great interest into our work and was able to provide their own experience of participating in nature-based activities such as gardening and community walks as part of GHP. Examples of these included community run organisations like Growing People Growing Places, which was a gardening project they had previously attended. They reported the benefits of this, which aimed to enable their rehabilitation journey. It was mentioned that the process of touching the plants, the smell, the weather, i.e. sunshine all plays a role in the rehabilitation process.    Other critical points included   - People talking to each other is a big positive experience. Hearing about other people’s day, being an introvert, it can really help you get out there and make new friends - Knowing other people have gone through or are going through the same or much worse situation really does help mentally, and creates a bond between us - A certificate issued at the end of the 12-week course provided a sense of achievement, something to be proud of which them mentally - They thought that a prescription administered by a primary care doctor/physician is more effective than programs that you can attend without the prescription - This prescribed component can also subconsciously allow us to take responsibility towards the program, rather than just choosing to go from personal choice based on the fact, it is supported by an advanced healthcare professional. | 30 |
| 4: Discussion and conclusions: Outcomes – Comment on the extent to which PPI influenced the study overall. Describe positive and negative effects | Patient and public contributors played a significant role in shaping key aspects of the study’s interpreting of findings and recommendations. The diverse and unique experiences and perspectives shared by the co-production group into the implementation of green prescribing within a UK context greatly enhanced the review team’s understanding of the many different forms and potential mechanisms of GHP and helped us to contextualise the evidence reported in the literature. They made the review team appreciate the personalised nature of GHP and sensitised us to the potential impact of nature-based interventions on spiritual wellbeing at personal level and on community cohesion at societal level, in addition to the physiological, physical, cognitive and psychological outcomes that we planned to examine as described in our protocol. The very positive experience reported by service users of the PPI group may have made members of the review team leaning more towards a positive interpretation of reviewed evidence. Nevertheless, the review team was aware of the potential bias and has tried to minimise it by adhering to a systematic approach to evaluating the evidence. This was also helped by a later expansion of the review team, with members not exposed to the interaction with PPI members involving in grading the quality and certainty of evidence.  The very positive experience reported by service users may have made members of the review team leaning more towards a positive interpretation of reviewed evidence. Nevertheless, the review team was aware of the potential bias and has tried to minimise it by adhering to a systematic approach to evaluating the evidence. This was also helped by a later expansion of the review team, with members not exposed to the interaction with PPI members involving in grading the quality and certainty of evidence. | 30 |
| 5: Reflections/critical perspective: Critical Perspective-Comment critically on the study, reflecting on the things that went well and those that did not, so others can learn from this experience | We initially planned to run the PPI group as a single group covering both service users and service providers. However, following the introductory meetings which we held separately with individual service provider(s) and service user(s) due to logistic reasons, we decided to keep the two groups separate as we noticed that the focus, content and pace of discussions differed substantially between the groups. This arrangement may have enabled members of each group (service users vs service providers) to talk more freely about their genuine feelings, perceptions and issues that were most important to them without the discussions being dominated by one group. On the other, keeping the groups separate may have resulted in some missed opportunities for PPI group members to share different perspectives, which could trigger further thoughts and foster sharing understanding. However, we brought the two groups together in a final meeting in which we have shared the final review findings with them.    The PPI within this systematic review demonstrated vast and practical experience of both partaking in nature-based interventions and administering these as prescriptions. This was the primary strength of the PPI involvement, providing the invaluable real-world perspectives into the review. This helped validate some of the key points that we identified in the literature through demonstrating that these were also picked up by public contributors. What went well was the consistent engagement and interest of the PPI group members throughout the review process. Arranging future meetings was easier because of consistent engagement and inclusivity, providing useful input in different stages of the review.    A significant challenge throughout the PPI process of this review was the difficulty in aligning group members’ availability and collectively holding a meeting based on everyone’s timescales. We overcame this through holding separate meetings with different PPI group members in a flexible way, with the potential advantages and drawbacks described earlier. | NR in this manuscript, a separate paper focusing on PPI in this review is being considered |

**Appendix 5: Search strategy (all sources)**

**Search carried out 29th and 30thOctober 2024**

**Ovid MEDLINE(R) ALL 1946 to October 28, 2024**

1 Middle Aged/ 4883680

2 exp Aged/ 3590243

3 Geriatrics/ 31832

4 Healthy Aging/ or Health Services for the Aged/ 20800

5 (Elder* or geriatric* or senior*).ti,ab,kf. 440798

6 (older adj (adult? or m#n or wom#n or person? or people)).ti,ab,kf. 209369

7 (Age? adj3 (over or older) adj2 (5# or 6# or 7# or 8# or 9#)).ti,ab,kf. 59713

8 (Quinquagenarian* or sexagenarian* or hexagenarian* or septuagenarian* or octogenarian* or nonagenarian* or centenarian* or gerontolog*).ti,ab,kf. 18140

9 (">=5# years old" or ">5# years old").ti,ab,kf. 19053

10 (">=6# years old" or ">6# years old").ti,ab,kf. 30436

11 (">=7# years old" or ">7# years old").ti,ab,kf. 18030

12 (">=8# years old" or ">8# years old").ti,ab,kf. 10965

13 (">=9# years old" or ">9# years old").ti,ab,kf. 3650

14 or/1-13 [Older people] 5973648

15 ((Green or blue) adj5 (space* or area*1 or zone*1 or corridor* or connector* or environment*1 or architecture* or infrastructure* or design* or setting* or surrounding* or urban or rural)).ti,ab,kf. 12829

16 (Greenspace* or bluespace*).ti,ab,kf. 950

17 ((Green or blue) adj5 (urban* or neighbourhood* or neighborhood* or community or communities or city or cities or town or towns or suburb* or semiurban or periurban or semisuburban or residential or municipal or metropolitan or metropolis* or agriculture or agricultural*)).ti,ab,kf. 4503

18 Environmental Exposure/ or "Ecological and Environmental Phenomena"/ or ecosystem/ or biodiversity/ 242134

19 ((Green* or eco* or environment* or nature*) adj3 health*).ti,ab,kf. 118230

20 ((Green or blue or outdoor* or natural or nature) adj5 (gym* or activit* or recreation*)).ti,ab,kf. 37282

21 Nature/ 1032

22 ((Natur* or nature-based or outdoor*) adj5 (intervention* or activit* or connect* or engage* or environment* or capital*)).ti,ab,kf. 79228

23 ((Natur* or nature-based or outdoor* or outside) adj3 (driven or orientated or space or setting* or expos* or time or surrounding*)).ti,ab,kf. 32217

24 agriculture/ or farms/ or "Oceans and Seas"/ or grassland/ or wetlands/ or exp forests/ 110094

25 (Ecotherap* or care farm*).ti,ab,kf. 112

26 gardening/ or gardens/ or horticultural therapy/ 1881

27 (Garden* or horticultur* or allotment*1).ti,ab,kf. 24269

28 bathing beaches/ or parks, recreational/ 4629

29 (Park or parks or parkland* or tree or trees or wood or woods or woodland* or forest* or river or rivers or ocean or oceans or beach or beaches or wilderness).ti,ab,kf. 468216

30 Golf/ or walking/ or running/ or Bicycling/ 79093

31 ((Outdoor* or park or lawn) adj3 bowl*).ti,ab,kf. 15

32 Swimming/ and (open water or openwater or outside or outdoor* or wild*).ti,ab,kf. 956

33 (Swim* adj3 (open water or openwater or outside or outdoor* or wild*)).ti,ab,kf. 391

34 (Forest* adj2 (therap* or bath*)).ti,ab,kf. 265

35 "Activities of Daily Living"/ or exercise/ or exercise therapy/ or Motor Activity/ or yoga/ or dancing/ or tai ji/ or relaxation therapy/ or recreation/ or (exercis* or gym* or walk* or running or yoga or tai chi or tai ji or relax* or leisure or leisurely or recreation* or dance or dancing or meditation).ti,ab,kf. 1071004

36 (outdoor* or outside* or natur* or urban* or rural*).ti,ab,kf. 1988297

37 35 and 36 71131

38 (or/15-34) or 37 [Green spaces or outdoor exercise] 1085961

39 exp Prescriptions/ 43136

40 "Referral and Consultation"/ 78495

41 (Prescription* or prescrib*).ti,ab,kf. 299836

42 General Practitioners/ or Physicians, Primary Care/ or nurse practitioners/ 35186

43 (GP or GPs).ti,ab,kf. 76107

44 Primary Health Care/ or Family Practice/ 158328

45 (primary adj4 (care or health* or service* or center* or centre* or practice*)).ti,ab,kf. 231834

46 ((general or nurse or nursing or family) adj (practice* or practitioner* or physician* or doctor* or nurs*)).ti,ab,kf. 168231

47 ((Communit* or primary or social* or scheme* or wellbeing or well-being or pathway*) adj3 (refer* or linkage or program* or treat* or intervention*)).ti,ab,kf. 210372

48 ((Communit* or patient*) adj2 (connector* or navigat* or advocat*)).ti,ab,kf. 7576

49 (link-worker* or linkworker*).ti,ab,kf. 195

50 or/39-49 [Prescribing] 990749

51 14 and 38 and 50 7907

52 limit 51 to yr="2000 -Current" 7152

53 limit 52 to english language 6890

**Embase Classic+Embase 1947 to 2024 October 28**

1 middle aged/ 2477435

2 aged/ or frail elderly/ or institutionalized elderly/ or very elderly/ 4153400

3 geriatrics/ 43541

4 healthy aging/ 5919

5 aging/ 353680

6 elderly care/ 43234

7 (Elder* or geriatric* or senior*).ti,ab,kf. 630708

8 (older adj (adult? or m#n or wom#n or person? or people)).ti,ab,kf. 263493

9 (Age? adj3 (over or older) adj2 (5# or 6# or 7# or 8# or 9#)).ti,ab,kf. 90437

10 (Quinquagenarian* or sexagenarian* or hexagenarian* or septuagenarian* or octogenarian* or nonagenarian* or centenarian* or gerontolog*).ti,ab,kf. 26954

11 (">=5# years old" or ">5# years old").ti,ab,kf. 39707

12 (">=6# years old" or ">6# years old").ti,ab,kf. 60919

13 (">=7# years old" or ">7# years old").ti,ab,kf. 37057

14 (">=8# years old" or ">8# years old").ti,ab,kf. 22437

15 (">=9# years old" or ">9# years old").ti,ab,kf. 7383

16 or/1-15 [Older people] 6180119

17 ((Green or blue) adj5 (space* or area*1 or zone*1 or corridor* or connector* or environment*1 or architecture* or infrastructure* or design* or setting* or surrounding* or urban or rural or gym*)).ti,ab,kf. 14791

18 (Greenspace* or bluespace*).ti,ab,kf. 970

19 ((Green or blue) adj5 (urban* or neighbourhood* or neighborhood* or community or communities or city or cities or town or towns or suburb* or semiurban or periurban or semisuburban or residential or municipal or metropolitan or metropolis* or agriculture or agricultural*)).ti,ab,kf. 4629

20 environmental exposure/ 135910

21 ecosystem/ 97278

22 biodiversity/ 54770

23 ((Green* or eco* or environment* or sustainable or nature*) adj3 health*).ti,ab,kf. 147938

24 ((Green or blue or outdoor* or natural or nature) adj5 (gym* or activit* or recreation*)).ti,ab,kf. 44964

25 ((Natur* or nature-based or outdoor*) adj5 (intervention* or activit* or connect* or engage* or environment* or capital*)).ti,ab,kf. 91865

26 ((Natur* or nature-based or outdoor* or outside) adj3 (driven or orientated or space or setting* or expos* or time or surrounding*)).ti,ab,kf. 39741

27 agriculture/ 62119

28 agriculture/ 62119

29 sea/ 24574

30 grassland/ 8592

31 wetland/ 12539

32 forest/ 37627

33 forest bathing/ 71

34 (Ecotherap* or care farm*).ti,ab,kf. 126

35 gardening/ 2622

36 "land use"/ 22504

37 horticultural therapy/ 209

38 (Garden* or horticultur* or allotment*1).ti,ab,kf. 26991

39 seashore/ 24009

40 recreational park/ or national park/ 5144

41 (Park or parks or parkland* or tree or trees or wood or woods or woodland* or forest* or river or rivers or ocean or oceans or beach or beaches or wilderness).ti,ab,kf. 542027

42 golf/ 1333

43 nordic walking/ or walking/ 95667

44 running/ 43054

45 cycling/ 17584

46 ((Outdoor* or park or lawn) adj3 bowl*).ti,ab,kf. 23

47 Swimming/ and (open water or openwater or outside or outdoor* or wild*).ti,ab,kf. 1566

48 (Swim* adj3 (open water or openwater or outside or outdoor* or wild*)).ti,ab,kf. 441

49 (Forest* adj2 (therap* or bath*)).ti,ab,kf. 302

50 daily life activity/ 125756

51 exercise/ 399214

52 kinesiotherapy/ 44496

53 motor activity/ 54926

54 exp yoga/ 12929

55 dancing/ 7391

56 Tai Chi/ 4432

57 relaxation training/ 12804

58 recreation/ 23236

59 (exercis* or gym* or walk* or running or yoga or tai chi or tai ji or relax* or leisure or leisurely or recreation* or dance or dancing or meditation).ti,ab,kf. 1139417

60 (or/50-59) and (outdoor* or outside* or natur* or urban* or rural*).ti,ab,kf. 93929

61 (or/17-49) or 60 [Green spaces or outdoor exercise] 1363467

62 prescription/ 277111

63 patient referral/ 174540

64 consultation/ or face-to-face consultation/ 162908

65 (Prescription* or prescrib*).ti,ab,kf. 508312

66 general practitioner/ 131081

67 general practice/ 95537

68 primary medical care/ 142882

69 nurse practitioner/ 30321

70 (GP or GPs).ti,ab,kf. 110440

71 primary health care/ 84198

72 (primary adj4 (care or health* or service* or center* or centre* or practice*)).ti,ab,kf. 315107

73 ((general or nurse or nursing or family) adj (practice* or practitioner* or physician* or doctor* or nurs*)).ti,ab,kf. 218537

74 ((Communit* or primary or social* or scheme* or wellbeing or well-being or pathway*) adj3 (refer* or linkage or program* or treat* or intervention*)).ti,ab,kf. 310272

75 ((Communit* or patient*) adj2 (connector* or navigat* or advocat*)).ti,ab,kf. 11952

76 (link-worker* or linkworker*).ti,ab,kf. 247

77 or/62-76 [Prescribing] 1727501

78 16 and 61 and 77 12525

79 limit 78 to yr="2000 -Current" 11910

80 limit 79 to english language 11636

**APA PsycInfo 1806 to October 2024 Week 4**

1 (aged* or very old*).ag. 419879

2 elderly.ti,ab,id. 70513

3 (Senior or geriatric*).ti,ab,id. 46171

4 (older adj (adult? or m#n or wom#n or person? or people)).ti,ab,id. 95933

5 exp Geriatrics/ 15937

6 Gerontology/ 10220

7 (Age? adj3 (over or older) adj2 (5# or 6# or 7# or 8# or 9#)).ti,ab,id. 18197

8 (Sexagenarian or septuagenarian or octogenarian or nonagenarian or centenarian or gerontolog*).ti,ab,id. 7645

9 (">=5# years old" or ">5# years old").ti,ab,id. 2156

10 (">=6# years old" or ">6# years old").ti,ab,id. 3657

11 (">=7# years old" or ">7# years old").ti,ab,id. 1799

12 (">=8# years old" or ">8# years old").ti,ab,id. 1457

13 (">=9# years old" or ">9# years old").ti,ab,id. 595

14 or/1-13 [Older persons] 497476

15 ((Green or blue) adj5 (space* or area*1 or zone*1 or corridor* or connector* or environment*1 or architecture* or infrastructure* or design* or setting* or surrounding* or urban or rural)).ti,ab,id. 1773

16 (Greenspace* or bluespace*).ti,ab,id. 181

17 ((Green or blue) adj5 (urban* or neighbourhood* or neighborhood* or community or communities or city or cities or town or towns or suburb* or semiurban or periurban or semisuburban or residential or municipal or metropolitan or metropolis* or agriculture or agricultural*)).ti,ab,id. 611

18 environment/ or environmental enrichment/ or "nature (environment)"/ or public space/ or environmental health/ or natural resources/ 25298

19 ecology/ or ecological factors/ or social ecology/ or natural resources/ or pro environmental behavior/ 11157

20 ((Green* or eco* or environment* or nature*) adj3 health*).ti,ab,id. 20303

21 ((Green or blue or outdoor* or natural or nature) adj5 (gym* or activit* or recreation*)).ti,ab,id. 5837

22 ((Natur* or nature-based or outdoor*) adj5 (intervention* or activit* or connect* or engage* or environment* or capital*)).ti,ab,id. 22280

23 ((Natur* or nature-based or outdoor* or outside) adj3 (driven or orientated or space or setting* or expos* or time or surrounding*)).ti,ab,id. 12946

24 agriculture/ or "plants (botanical)"/ or rural environments/ 27608

25 (Ecotherap* or care farm*).ti,ab,id. 157

26 horticulture therapy/ or nature-based interventions/ or recreation therapy/ 1083

27 (Garden* or horticultur* or allotment*1).ti,ab,id. 4179

28 recreation areas/ 1599

29 (Park or parks or parkland* or tree or trees or wood or woods or woodland* or forest* or river or rivers or ocean or oceans or beach or beaches or wilderness).ti,ab,id. 38849

30 walking/ 7742

31 Running/ 2573

32 Cycling/ 789

33 ((Outdoor* or park or lawn) adj3 bowl*).ti,ab,id. 6

34 Swimming/ and (open water or openwater or outside or outdoor* or wild*).ti,ab,id. 90

35 (Swim* adj3 (open water or openwater or outside or outdoor* or wild*)).ti,ab,id. 50

36 (Forest* adj2 (therap* or bath*)).ti,ab,id. 40

37 "activities of daily living"/ or physical mobility/ 10292

38 Exercise/ or Aerobic Exercise/ or Exercise Therapy/ 31866

39 Motor Performance/ 10652

40 Yoga/ 2675

41 Dance Therapy/ or Dance/ 4560

42 Physical Activity/ 29580

43 Relaxation Therapy/ 3084

44 Recreation/ or Recreation Therapy/ 7435

45 (exercis* or gym* or walk* or running or yoga or tai chi or tai ji or relax* or leisure or leisurely or recreation* or dance or dancing or meditation).ti,ab,id. 203442

46 (or/37-45) and (outdoor* or outside* or natur* or urban* or rural*).ti,ab,id. 27171

47 15 or 16 or 17 or 18 or 19 or 20 or 21 or 22 or 23 or 24 or 25 or 26 or 27 or 28 or 29 or 30 or 31 or 32 or 33 or 34 or 35 or 36 or 46 180827

48 social prescribing/ 81

49 treatment/ 85172

50 Self-Referral/ or Professional Referral/ 4192

51 (Prescription* or prescrib*).ti,ab,id. 57205

52 General Practitioners/ 6637

53 Primary Health Care/ 22893

54 (GP or GPs).ti,ab,id. 9484

55 Family Physicians/ 1672

56 (primary adj4 (care or health* or service* or center* or centre* or practice*)).ti,ab,id. 53110

57 ((general or nurse or nursing or family) adj (practice* or practitioner* or physician* or doctor* or nurs*)).ti,ab,id. 32440

58 ((Communit* or primary or social* or scheme* or wellbeing or well-being or pathway*) adj3 (refer* or linkage or program* or treat* or intervention*)).ti,ab,id. 81429

59 ((Communit* or patient*) adj2 (connector* or navigat* or advocat*)).ti,ab,id. 2036

60 (link-worker* or linkworker*).ti,ab,id. 68

61 or/48-60 [Prescribing or primary care] 290967

62 14 and 47 and 61 1992

63 limit 62 to english language 1961

64 limit 63 to yr="2000 -Current" 1803

**Applied Social Sciences Index & Abstracts (ASSIA)**

| **Set#** | **Searched for** | **Databases** | **Results** |
| --- | --- | --- | --- |
| S1 | MAINSUBJECT.EXACT("Aging") OR MAINSUBJECT.EXACT("Elder care") OR MAINSUBJECT.EXACT("Older people") OR MAINSUBJECT.EXACT("Geriatrics") | Applied Social Sciences Index & Abstracts (ASSIA) | 46627 |
| S2 | MAINSUBJECT.EXACT("Elder care") | Applied Social Sciences Index & Abstracts (ASSIA) | 2607 |
| S3 | noft((Elder* or geriatric* or senior*)) | Applied Social Sciences Index & Abstracts (ASSIA) | 63260 |
| S4 | noft((older NEAR/1 (adult OR adults OR men OR man OR women OR woman OR person OR people))) OR noft(((Age OR Aged) NEAR/3 (over OR older) NEAR/2 (50 OR 55 OR 60 OR 65 OR 70 OR 75 OR 80 OR 85 OR 90 OR 95))) OR noft(elderly OR geriatric OR geriatrics OR senior OR gerontology) OR noft(sexagenarian OR septuagenarian OR octogenarian OR nonagenarian OR centenarian) | Applied Social Sciences Index & Abstracts (ASSIA) | 97096 |
| S5 | [S1] OR [S2] OR [S3] OR [S4] | Applied Social Sciences Index & Abstracts (ASSIA)  These databases are searched for part of your query. | 102531 |
| S6 | noft((Green or blue) NEAR/5 (space  or spaces or area or areas or zone or corridor or connector or environment or architecture or infrastructure or design or setting or urban or rural)) | Applied Social Sciences Index & Abstracts (ASSIA) | 531 |
| S7 | noft(Greenspace* or bluespace*) | Applied Social Sciences Index & Abstracts (ASSIA) | 102 |
| S8 | noft((Green or blue) near/5 (urban or neighbourhood or neighborhood or community or communities or city or cities or town or towns or suburb* or semiurban or periurban or semisuburban or residential or municipal or metropolitan or metropolis or agriculture or agricultural)) | Applied Social Sciences Index & Abstracts (ASSIA) | 290 |
| S9 | MAINSUBJECT.EXACT("Natural landscapes") OR (MAINSUBJECT.EXACT("Environmental psychology") OR MAINSUBJECT.EXACT("Environmentalism") OR MAINSUBJECT.EXACT("Environment") OR MAINSUBJECT.EXACT("Environmental health")) | Applied Social Sciences Index & Abstracts (ASSIA) | 3612 |
| S10 | MAINSUBJECT.EXACT("Ecological approach") OR MAINSUBJECT.EXACT("Community ecological approach") | Applied Social Sciences Index & Abstracts (ASSIA) | 130 |
| S11 | noft(((Green* or eco* or environment* or nature*) NEAR/3 health)) | Applied Social Sciences Index & Abstracts (ASSIA) | 11651 |
| S12 | noft((Green or blue or outdoor or natural or nature) NEAR/5 (gym* or activit* or recreation*)) | Applied Social Sciences Index & Abstracts (ASSIA) | 1407 |
| S13 | MAINSUBJECT.EXACT("Natural phenomena") OR noft(((NaturE OR natural or "nature based" or naturebased or outdoor) NEAR/5 (intervention or activity or activities or connected or connection or engage or engagement or engaged or environment or environmental or capital))) | Applied Social Sciences Index & Abstracts (ASSIA) | 4325 |
| S14 | noft((Nature or natural or "nature based" or naturebased or outdoor or outdoors or outside) NEAR/3 (driven or orientated or space or setting or expose or exposed or exposure or time or surroundings)) | Applied Social Sciences Index & Abstracts (ASSIA) | 2388 |
| S15 | (MAINSUBJECT.EXACT("Rural areas") OR MAINSUBJECT.EXACT("Gardens & gardening") OR MAINSUBJECT.EXACT("Plants") OR MAINSUBJECT.EXACT("Farms") OR MAINSUBJECT.EXACT("Agriculture")) OR MAINSUBJECT.EXACT("Beaches") OR MAINSUBJECT.EXACT("Forests") | Applied Social Sciences Index & Abstracts (ASSIA) | 14463 |
| S16 | noft((Ecotherapy or ecotherapeutic or ecotherapies or "care farm" or "care farming" or "care farms")) | Applied Social Sciences Index & Abstracts (ASSIA) | 46 |
| S17 | MAINSUBJECT.EXACT("Horticulture") OR MAINSUBJECT.EXACT("Nurseries") | Applied Social Sciences Index & Abstracts (ASSIA) | 195 |
| S18 | noft((Garden or gardening or gardens or horticulture or horticultural or allotment or allotments)) | Applied Social Sciences Index & Abstracts (ASSIA) | 1632 |
| S19 | noft(Park or parks or parkland or tree or trees or wood or woods or woodland or forest or river or rivers or ocean or oceans or beach or beaches or wilderness) | Applied Social Sciences Index & Abstracts (ASSIA) | 26524 |
| S20 | (MAINSUBJECT.EXACT("Golf") OR MAINSUBJECT.EXACT("Golf courses")) OR MAINSUBJECT.EXACT("Walking") OR (MAINSUBJECT.EXACT("Bicyclists") OR MAINSUBJECT.EXACT("Bicycles")) | Applied Social Sciences Index & Abstracts (ASSIA) | 4146 |
| S21 | noft(((Outdoor* or park or lawn) near/3 bowls or bowling)) | Applied Social Sciences Index & Abstracts (ASSIA) | 775 |
| S22 | (MAINSUBJECT.EXACT("Swimming") OR MAINSUBJECT.EXACT("Swimming pools")) AND noft("open water" or openwater or outside or outdoor or outdoors or wild) | Applied Social Sciences Index & Abstracts (ASSIA) | 17 |
| S23 | noft(((Swim or swimming or swimmers) near/3 ("open water" or openwater or outside or outdoor or outdoors or wild))) | Applied Social Sciences Index & Abstracts (ASSIA) | 6 |
| S24 | noft(Forest near/2 (therapy or therapeutic or bath or bathing)) | Applied Social Sciences Index & Abstracts (ASSIA) | 15 |
| S25 | MAINSUBJECT.EXACT("Activities of daily living") OR (MAINSUBJECT.EXACT("Water exercise") OR MAINSUBJECT.EXACT("Dance exercise") OR MAINSUBJECT.EXACT("Aerobic exercise") OR MAINSUBJECT.EXACT("Exercise") OR MAINSUBJECT.EXACT("Fitness training programs") OR MAINSUBJECT.EXACT("Exercise therapy") OR MAINSUBJECT.EXACT("Muscle strength")) OR MAINSUBJECT.EXACT("Yoga") OR MAINSUBJECT.EXACT("Relaxation training") OR (MAINSUBJECT.EXACT("Activities") OR MAINSUBJECT.EXACT("Recreation") OR MAINSUBJECT.EXACT("Sports")) AND (outdoor or outdoors or outside or nature or natural or urban or rural or rurally) | Applied Social Sciences Index & Abstracts (ASSIA) | 24064 |
| S26 | [S6] OR [S7] OR [S8] OR [S9] OR [S10] OR [S11] OR [S12] OR [S13] OR [S14] OR [S15] OR [S16] OR [S17] OR [S18] OR [S19] OR [S20] OR [S21] OR [S22] OR [S23] OR [S24] OR [S25] | Applied Social Sciences Index & Abstracts (ASSIA)  These databases are searched for part of your query. | 85865 |
| S27 | (MAINSUBJECT.EXACT("Referrals") OR MAINSUBJECT.EXACT("Medical referrals")) OR MAINSUBJECT.EXACT("Consultation") | Applied Social Sciences Index & Abstracts (ASSIA) | 6904 |
| S28 | noft((Prescription or prescriptions or prescribe or prescribing)) | Applied Social Sciences Index & Abstracts (ASSIA) | 17631 |
| S29 | MAINSUBJECT.EXACT("Family physicians") OR MAINSUBJECT.EXACT("Nurse practitioners") | Applied Social Sciences Index & Abstracts (ASSIA) | 8386 |
| S31 | noft(GP or GPs) | Applied Social Sciences Index & Abstracts (ASSIA) | 8428 |
| S32 | MAINSUBJECT.EXACT("Primary care") OR MAINSUBJECT.EXACT("Primary health care professionals") | Applied Social Sciences Index & Abstracts (ASSIA) | 15757 |
| S33 | noft((primary near/4 (care or health or service or center or centre or practice))) | Applied Social Sciences Index & Abstracts (ASSIA) | 40524 |
| S34 | noft((general or nurse or nursing or family) near/1 (practice or practitioner or physician or doctor or nurse or nursing)) | Applied Social Sciences Index & Abstracts (ASSIA) | 231024 |
| S35 | noft((Community or primary or social or scheme or wellbeing or well-being or pathway) NEAR/3 (refer or referral or referred or linkage or program or programme or treat or treatment or treated or intervention)) | Applied Social Sciences Index & Abstracts (ASSIA) | 35697 |
| S36 | noft((Community or patient) NEAR/2 (connector or navigation or navigator or advocate or advocator or advocated)) | Applied Social Sciences Index & Abstracts (ASSIA) | 1124 |
| S37 | noft(link-worker or linkworker) | Applied Social Sciences Index & Abstracts (ASSIA) | 49 |
| S38 | [S27] OR [S28] OR [S29] OR [S31] OR [S32] OR [S33] OR [S34] OR [S35] OR [S36] OR [S37] | Applied Social Sciences Index & Abstracts (ASSIA)  These databases are searched for part of your query. | 299180 |
| S39 | [S5] AND [S26] AND [S38] | Applied Social Sciences Index & Abstracts (ASSIA)  These databases are searched for part of your query. | 3623 |
| S40 | ([S5] AND [S26] AND [S38]) AND pd(20200101-20241030) | Applied Social Sciences Index & Abstracts (ASSIA)  These databases are searched for part of your query. | 1157 |
| S41 | ([S5] AND [S26] AND [S38]) AND pd(20200101-20241030) | Applied Social Sciences Index & Abstracts (ASSIA)  These databases are searched for part of your query. | 1157 |
| S42 | ([S5] AND [S26] AND [S38]) AND (la.exact("ENG") AND pd(20200101-20241030)) | Applied Social Sciences Index & Abstracts (ASSIA)  These databases are searched for part of your query. | 1157 |

**Overton**

**Policy**

("Green health prescription" "green health prescriptions" or "green health prescribing" or “green health prescribed” or “green health prescribe” or "Prescribing green health" or "green prescription" or “green prescriptions” or “green prescribing” or "nature prescription" or "nature prescriptions" or "nature based prescription" or “nature based prescriptions” or “nature based intervention” or "nature based interventions” or “nature based referral” or "nature based referrals” or “green referrals” or “green referral” or “green health partnership” or “nature prescription”) AND (Older or elder or elderly or aged or aging or frail or frailty) published after 01 Jan 2000 624 policy results

**Scholarly articles:**

("Green health prescription" "green health prescriptions" or "green health prescribing" or “green health prescribed” or “green health prescribe” or "Prescribing green health" or "green prescription" or “green prescriptions” or “green prescribing” or "nature prescription" or "nature prescriptions" or "nature based prescription" or “nature based prescriptions” or “nature based intervention” or "nature based interventions” or “nature based referral” or "nature based referrals” or “green referrals” or “green referral” or “green health partnership” or “nature prescription”) AND (Older or elder or elderly or aged or aging or frail or frailty) 10 results

**Dimensions**

"Green health prescription" OR "green health prescriptions" 17 results

"Green prescription" OR "prescribing green health" 92 results

“green prescriptions” or “green prescribing” or "nature prescription" 20 results

"nature based prescription" or “nature based prescriptions” or “nature based intervention” 11 results

“nature based referral” or "nature based referrals” or “green referrals” or “green referral” or “green health partnership” or “nature prescription” 0 results

**Google**

“Green health prescription” filetype:pdf 28 includes

“Green health prescribing” filetype:pdf 23 includes

“Green health” filetype:pdf scanned first 10 pages for relevance 16 includes

“Green health prescription” scanned first 10 pages for relevance 8 includes

**Appendix 6: Outcome categories**


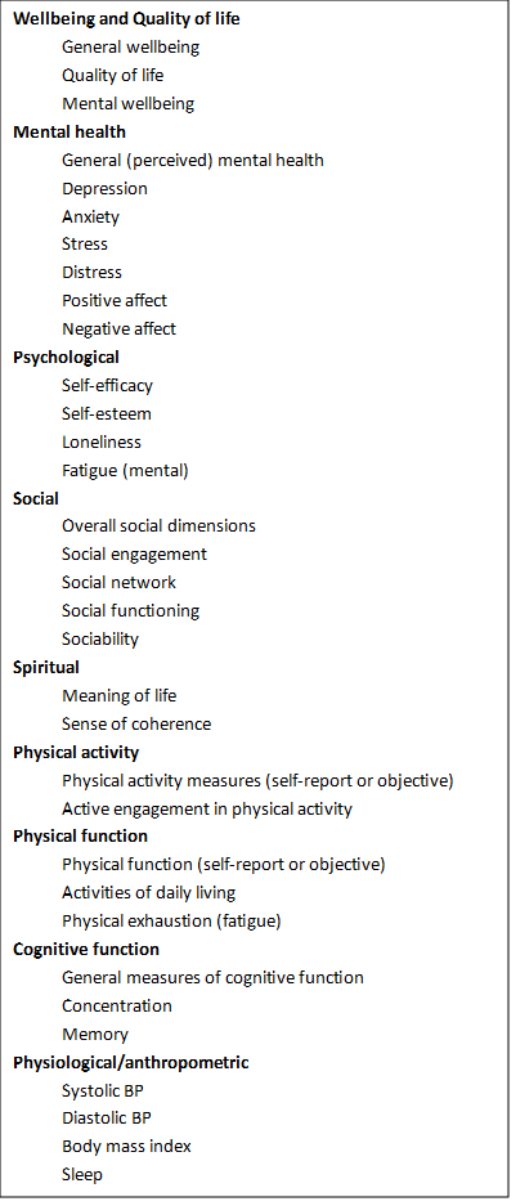


**Appendix 7: Characteristics of effectiveness studies (n = 21)** [activities in nature n = 6; green space exercise n = 3; indoor gardening n = 4; horticultural n = 9]

| **Study IDa**  **Country** | **Study design**  (Arranged by design) | **Target population**  **(Total n and age at baseline)** | **Brief description of intervention detail** | **Control intervention** | **Outcomes of interest reporteda** | **Quality/Risk of bias/study limitations** |
| --- | --- | --- | --- | --- | --- | --- |
| **Activities in nature** | | | | | | |
| Chun et al 2017  (33)  Republic of Korea | RCT | Chronic stroke, ≥1 year after onset, recruited from a stroke welfare centre  **N = 59**  Mean age (SD): 60.8 (9.1) years [range: 36-79 years] | **Not prescribed/referred**  *Intervention:* Forest therapy – walking, meditation activities, and using all 5 senses, staying at a recreational forest site  *Group/individual*: Group  *Duration*: 4-day 3-night programme  *Service provider*: NR | Urban group – walking and meditation activities staying in an urban hotel | Mental health:   - Depression - Anxiety | MMAT: 4    **Low RoB** |
| Kolster et al 2023 (34)  Finland | Quasi-experimental | Primary care patients referred by nurses or doctors, or social service clients referred by social workers. Professionals instructed to identify people that might benefit from target health interventions especially those in poor health  **N = 79**  Mean age (SD): 57 (11) years  [range 29-81] | **Referred [into program]**  *Intervention*: Nature program - learning about nature, and visiting biotopes such as forests, farmland, lakes, seashore. Sensory exercises to connect with nature were performed.  *Group/individual:* Group  *Duration:* 7 sessions over an 8-week period  *Service provider:* 2 nature guides | Exercise program meeting weekly at community sports facilities. Led by professional sports instructor in cooperation with health professionals | Wellbeing and Quality of life:   - Mental well-being   Mental health:   - Perceived mental health   Physiological/anthropometric:   - Sleep | MMAT: 3    **Moderate RoB** |
| Sung et al 2012 (35)  Republic of Korea | Quasi-experimental | Older adults with hypertension, higher range of pre-hypertension or on antihypertensives, referred from local health centres [into study]  **N = 56**completing 8-week follow-up  Mean age (SD):   - Forest - 63 (11) years - Control - 66 (7) years | **Not prescribed/referred**  *Intervention*: Forest therapy programme (CBT-based) including educational sessions, guided activity programmes including meditation, and using all 5 senses, at 1 of 2 recreation forest sites. Self-monitoring of BP for 8 weeks  *Group/individual*: Group  *Duration*: 3-day programme  *Service provider*: NR | Printed educational materials for hypertension management. Instructed to self-monitor BP for 8 weeks | Wellbeing and Quality of life:   - Quality of life - Mental well-being   Social:   - Overall social dimension   Physiological/anthropometric:   - Blood pressure | MMAT: 4    **Low RoB** |
| Carreño et al 2023 (36)  Spain | Mixed methods: quasi-experimental crossover study | Oncology patients, aged 18-70 years, ≥ 6 months post-treatment, ≤5 years post-diagnosis, non-active tumour in remission phase and ability to take part in water sports.  **N = 21**  Mean age (SD): 55 (8.4) years  [range 43-71] | **Not prescribed/referred**  *Intervention:* Blue space activities, namely walking along seafront, ii. bathing on the beach (relaxing or swimming in sea), iii. snorkelling i.e. swim and observe the ecosystem.  *Group/individual:*Unclear  *Duration:* For each activity 4 x 30-minute sessions over 2 summer seasons  *Service provider:* Research team members, diving instructor for snorkelling | Resting in a quiet room office without views and with no use of mobile devices, listening to music, reading or talking to other people, for 30 minutes. (4 sessions over 2 summers) | Wellbeing and Quality of life:   - Mental well-being - Fatigue (mental)   Mental health:   - Depression - Anxiety   Physiological/anthropometric:   - Blood pressure - Sleep | MMAT: 4    **Low RoB** |
| Maund et al 2019 (37)  UK | Mixed methods: single arm before-after design | Adults (≥18 years) diagnosed with anxiety and/or depression, referred through a community mental wellbeing service for individuals with poor mental health  **N = 16**  Age: Half (8/16) were ≥50 years old | **Referred [into program]**  *Intervention*: Wetland nature-based health intervention – guided nature walks and canoeing, bird- feeding, watching and identification.  *Group/individual:* Group  *Duration:* a 2-hour session per week, for 6 weeks  *Service provider:*Minimum of 2 wetland site staff members and 1 trained mental health support worker. | N/A | Wellbeing and Quality of life:   - Mental well-being   Mental health:   - Anxiety - Stress - Positive and negative affect | MMAT: 4    **Low RoB** |
| **Green space exercise** | | | | | | |
| Muller et al 2020 (39)  Singapore | RCT | Healthy adults, recruited at local community screening program at a hospital or following screening for a separate cohort study. 40-65 years old, self-reported exercise <150 mins per week, blood pressure ≤ 89/139 mmHg, fasting glucose ≤ 6.0 mmol/l.  **N = 160**  Mean age (SD): 51.1 (6.3) years | **Referred [into program]**  *Intervention*: Park prescription: Initial face-to-face counselling session on physical activity including goal setting; received information about local parks and facilities and a sheet to plan weekly physical activity. Also, invited to join a weekly structured, supervised physical activity program in a local park, with SMS reminders. Received a brief counselling phone call halfway through trial.  *Group/individual*: Individual and Group elements.  *Duration*: 6-month intervention, including optional 1-hour physical activity classes twice weekly.  *Service provider*: NR | Usual care including standard physical activity materials | Wellbeing and Quality of life:   - Overall well-being   Mental health:   - Distress   Physical activity:   - Moderate-vigorous activity - Physical activity in park   Physiological/anthropometric:   - Blood pressure - Body mass index | MMAT: 2    **High RoB** |
| Zhou et al 2023 (40)  China | RCT | Nursing home residents, older adults, aged ≥65 years, in stable health, able to move independently and follow instructions.  **N = 22**  Mean age (SD): 79.6 (6.3) years | **Not prescribed/referred**  *Intervention:*Outdoor rehabilitation exercise programme including agility, balance and strength training, taking place in an outdoor therapeutic garden.  *Group/individual:* Group  *Duration:* One-off, 30-minute session  *Service provider:* NR | Indoor rehabilitation exercise program (mirroring outdoor intervention in content and duration) | Physical activity:   - Active engagement in exercise   Physical function:   - Physical exhaustion (fatigue)   Physiological/anthropometric:   - Blood pressure | MMAT: 4    **Low RoB** |
| **Activities in nature and Green space exercise** | | | | | | |
| McCaffrey et al 2011 (38)  USA | Mixed methods: RCT | Adults aged >65 years, self-diagnosed or health care provider-diagnosed depression, able to walk 1 mile and able to attend the garden sessions.  **N = 39**  Mean age (SD):   - Group Walking/Guided Imagery: 74.60 (4.98) years - Independent Walking: 73.90 (6.79) years - Art therapy: 74.30 (6.40) years | Intervention 1 – Nature-based  **Not prescribed/referred**  *Intervention 1*: Group Walking/Guided Imagery – met at a garden and walked in a group whilst prompted to reflect on thoughts about life and nature.  *Group/individual*: Group  *Service provider:* Facilitator trained in guided imagery led the walk.  *Duration*: 1-2 hour session, twice weekly for 6 weeks | Art therapy - group met with a certified art therapist twice per week. Began with a self-portrait which they presented to the whole group. New drawings and discussions each week. Final session reflected on personal changes over the 6 weeks. | Mental health:   - Depression - Positive and negative affect | MMAT: 3    **Moderate RoB** |
| Intervention 2 – Exercise-based  **Not prescribed/referred**  *Intervention 2:*Independent walking- walked through the gardens alone.  *Group/individual*: Individual  *Service provider:*N/A  *Duration*: 1-2 hour session, twice weekly for 6 weeks |
| **Indoor gardening** | | | | | | |
| Chu et al 2019 (41)  Taiwan | RCT | Older adults recruited from nursing homes, >65 years old, able to communicate, cognitively intact, ability to perform self-care independently.  **N = 150**  Mean age   - Indoor program: 79.2 years - Control: 77.9 years | **Not prescribed/referred**  *Intervention:* Indoor horticultural activity program to stimulate senses, improve hand-eye coordination, develop horticultural ability and increase self-confidence and encourage interactions between participants. Activities included leaf tracing, clay pottery, planting, doll-making with plants and flowers and other craft activities decorating items with plants.  *Group/individual:* Group  *Duration:* 1½ - 2-hour session, once weekly for 8 weeks  *Service provider:* Lead researcher and 4 research assistants (all had horticulture licenses). | Routine care | Psychological   - Loneliness   Mental health:   - Depression | MMAT: 5    **Low RoB** |
| Jueng et al 2022 (14)  Taiwan | Cluster RCT | Long-term care facilities randomised.  Adults, ≥65 years old, with clear consciousness.  **N = 92**  Mean age (SD): 81.76 (8.47) years | **Not prescribed/referred**  *Intervention:* Indoor desktop gardening using a variety of plants (edibles and ornamental) in order to stimulate multiple senses and creativity.  *Group/individual:* Group  *Duration:*40-minute sessions, once a week for 12 weeks  *Service provider:* NR | Established traditional activities | Spiritual:   - Sense of coherence | MMAT: 4    **Low RoB** |
| Tse et al 2010 (42)  China (Hong Kong) | Mixed methods: Quasi-experimental | Nursing home residents, aged ≥60 years, able to communicate and cognitively intact (i.e. MMSE score ≥6).  **N = 53**  Mean age (SD)   - Indoor gardening: 85.23 (6.14) years - Control: 83.00 (7.85) years   [overall range 65-95 years] | **Not prescribed/referred**  *Intervention:* Indoor gardening sessions where participants picked seeds, planted and tended them throughout the intervention period, recording progress in a diary.  *Group/individual:*Group  *Duration:* Once weekly sessions for 8 weeks  *Service provider:*Researcher and research assistants | Regular nursing home care and visits | Wellbeing and Quality of life:   - Overall quality of life   Psychological:   - Loneliness   Social   - Social network   Physical function:   - Activities of daily living | MMAT: 4    **Low RoB** |
| Bassi et al 2018 (43)  Italy | Quasi-experimental, crossover | Older adults, at a residential nursing home, care facility for age >65, with a Mini Mental State Examinations score ≥18, not bed bound or with severe chronic conditions.  **N = 13**  Mean age (SD): 81.18 (4.17) years | **Not prescribed/referred**  *Intervention:* Indoor horticultural program based on a standard Therapeutic Gardening Activities procedure designed for older adults with mild-moderate dementia. Activities included aromatic plant sowing, planting bulbs in water, propagation, flowery plant arrangement, plant care, seedling transplanting.  *Group/individual:* Group  *Duration:* 1-hour session, once weekly for 6 weeks  *Service provider:* An agronomist and 2 researchers | Indoor occupational activities (including paper tree crafting, felt floral composition, and making a paper cutlery pocket) | Wellbeing and Quality of life:   - Overall quality of life   Cognitive function   - Concentration   Social:   - Sociability/Social engagement | MMAT: 4    **Low RoB** |
| **Horticultural interventions (includes studies where horticulture is a key part of the interventions, and there is also an outdoor element)** | | | | | | |
| Lai et al 2018 (44)  China | RCT | Residential care home residents, aged ≥70 years, able to communicate, frail or prefrail (Fried et al 2001 criteria), normal (Chinese Abbreviated Mental Test score of ≥6 of 10) or mildly impaired cognition (questionable/mild dementia according to the Clinical Dementia Rating scale), with no terminal illness or rapidly deteriorating health status.  **N = 111**  Mean age (SD): 84.60 (7.24) years | **Not prescribed/referred**  *Intervention:*Horticultural therapy tailor-made for frail, older adults. Activities included repotting plants, watering and feeding, trimming, propagation, species introduction and seeding. Participants grew and tended their own plants (and keep in their own rooms if possible). At least half of the time sessions were held outside.  *Group/individual:* Group  *Duration:* 1-hour sessions once weekly for 8 weeks.  *Service provider:*A registered horticultural therapist (with expertise in vulnerable groups) and an intern. | Social activities (without plants) e.g. talking about news, card games etc. | Wellbeing and Quality of life:   - Overall wellbeing   Psychological   - Self-efficacy   Social   - Social engagement - Social network   Mental health:   - Depression | MMAT: 3    **Moderate RoB** |
| Makizako et al 2019 (45)  Japan | RCT | Independent, community-dwelling older adults, aged ≥ 65 years, presence of depressive symptoms (Geriatric Depression Scale-15 score of ≥5) and memory problems (subjective or indicated by wordlist memory score) but not with a dementia diagnosis  **N = 89**  Mean age (SD): 73.1 (5.5) years | **Not prescribed/referred**  *Intervention 1:* Horticultural program, focussed on crop-related activities e.g. cultivating, growing and harvesting. Involved gardening activities including planting different plant varieties or plant shapes (known as Yoseue-style bonsai) and also planting flowers in a public garden. In addition, received education on nutrition and recipes using crops grown for purpose of the program.  *Group/individual:* Group  *Duration:* 20 sessions of 60 to 90 minutes, weekly  *Service provider:* Unclear – ‘vegetable experts’ provided the nutritional education. | Education only – two 90-minute sessions during 6-month trial period. Topics considered less likely to influence outcomes e.g. road safety and disaster prevention | Wellbeing and Quality of life:   - Overall wellbeing - Mental wellbeing   Social   - Social network - Social functioning   Mental health:   - Depression   Cognitive function   - Memory   Physical activity  Physical function | MMAT: 2    **High RoB** |
| **Not prescribed/referred**  *Intervention 2:* Exercise program including aerobic exercise, muscle strength training, postural balance retraining, and dual-task training (physical and cognitive exercises). 20 weekly 90-minute group sessions run by trained instructors at a fitness facility. |
| Ng et al 2017 (51)  Singapore | RCT | Older adults, aged 60-85 years old, with a minimum Montreal Cognitive Assessment score of 22, with no significant hearing or visual impairment or motor difficulties.  **N = 59**  Mean age (SD):   - Intervention: 67.21 (4.52) years - Control: 67.00 (4.18) years | **Not prescribed/referred**  *Intervention:* Horticultural therapy – outdoor session in parks, gardens and nature reserves. Activities ranged from indoor gardening, growing, maintaining and harvesting vegetables, herbs and other plants to guided walks in the various parks.  *Group/individual:* Group  *Duration:* Sessions of approx. 1 hour weekly for 3 months, and then monthly for the subsequent 3 months  *Service provider:* Experienced instructor. | Waitlist | Wellbeing and Quality of life:   - Mental wellbeing - Quality of life (Satisfaction with life)   Cognitive function  Social:   - Social network   Mental health:   - Depression - Anxiety | MMAT: 2    **High RoB** |
| Yang et al 2022 (52)  China | Pilot RCT | Nursing home residents in a dementia care unit. Adults aged ≥ 60 years, diagnosed with Alzheimer’s dementia (NINCDS/ADRDA criteria) and with Apathy (AES-I score of >35.5), were not physically impaired or with visual or upper limb disability.  **N = 32**  Median age (IQR): 84.5 (9.5) years | **Not prescribed/referred**  *Intervention:* Horticultural therapy program including planting (planting, growing, harvesting), handicraft (using natural materials) and diet (eating, drinking, cooking plants) activities were included. + usual care  *Group/individual:* Group  *Duration:*1-hour session, once weekly for 10 weeks (4 sessions each for planting and handicraft, and 2 sessions for diet)  *Service provider:* An activity leader (nurse, trained in horticultural skills) and 8 assistants (4 nurses and 4 social workers) | No additional intervention *i.e.* usual care only such as singing, games, and calisthenics activities (1 hour, twice weekly) | Wellbeing and Quality of life:   - Quality of life   Cognitive function  Physical function | MMAT: 5    **Low RoB** |
| Okvat et al 2012 (46)  USA | Mixed methods: Pilot RCT | Adults aged 55-79 year, in good physical health (according to SF-36), and able to themselves to the garden. Recruited locally (within 5 miles of the garden) through advertisements, email announcements, flyers across communities (libraries, churches, supermarkets, housing), and community gardening talks.  **N = 50**  Mean age (SD): 63.42 (5.67) years | **Not prescribed/referred**  *Intervention 1*: Traditional Community Gardening (TCG) with1.5 hours gardening and 1 hour checking in with each other and the garden co-ordinator, organising work, socialising, Q&A, and snack breaks. The group worked together to grow produce to take home and sell locally.  *Intervention 2:*Mindful Community Gardening (MCG)- same gardening activities as in TCG but guided to carry them out in a mindful way and take notice of the senses (non-judgemental, present-focused awareness).  *Group/individual*: Group (both)  *Duration*: 2½ hour sessions, once weekly for 9 weeks.  *Service provider:* Garden coordinator | Waitlist | Wellbeing and Quality of life:   - Overall wellbeing - Quality of life   Cognition   - Memory   Social:   - Social network   Mental health:   - Positive and negative affect | MMAT: 2    **High RoB** |
| Perkins et al 2011 (47)  USA | Quasi-experimental | Older adults from independent community-based, residences  **N = 34**  Mean age (SD): 72 (9.26) years  [range 57-87 years] | **Not prescribed/referred**  *Intervention*: Horticultural therapy program based on ‘*Horticultural Therapy and Seniors using Herbs: A Manual for Recreational Therapists and Master Gardeners*.’ (unpublished manual), included planting, plant-related activities, craft projects and food preparation. Each class focused on a specific herb.  *Group/individual:* Group  *Duration:* 90-minute session, once weekly for 6 weeks  *Service provider:* A facilitator and two assistants (at both locations) | Waitlist | Wellbeing and Quality of life:   - Mental wellbeing   Psychological:   - Self-efficacy - Self-esteem   Social:   - Social engagement | MMAT: 3    **Moderate RoB** |
| Yao et al 2017  Taiwan | Quasi-experimental | Older adults age ≥65 years, living in a nursing home > 3 months, intact cognitive functioning for age and educational level (according to Short Portable Mental Status Questionnaire), and no visual or auditory impairment.  **N = 85**  Mean age (SD)   - Intervention: 77.41 (8.56) - Control: 82.55 (7.50)   [range 65-99 years] | **Not prescribed/referred**  *Intervention:* Horticultural therapy focused on plant cultivation and plant-related material application. Static indoor activity on a table.  Each individual grew a small plant. Each session had a different theme but same structure: warm-up (10 minutes), instruction lecture (10 minutes), hands-on activity (30 minutes) and debrief (10 minutes).  *Group/individual:* Group  *Duration:*1-hour session, once weekly 8 weeks  *Service provider:* intervener with 30-hours horticultural training, 2-4 nursing assistants, 1 social worker and 1 administrative staff. | Routine nursing home activities (and told they would be invited to horticultural therapy sessions after the study finished, if interested) | Spiritual  Social:   - Social network   Physical function | MMAT: 4    **Low RoB** |
| Shen et al 2022 (49)  Taiwan    MMAT: 4 | Single-arm before-after study | Older adults recruited from residential facilities and adult day-care services, not bedridden or unable to control speech. Could include participants with dementia (Clinical Dementia Rating)  **N = 24**  Mean age (SD)   - Men: 81.71 (9.01) years - Women: 80.65 (5.22) years   [range 70-93 years] | **Not prescribed/referred**  *Intervention*: Six horticultural activities, 1 per session, guided by instructor and focused on:  1. vegetable planting; 2. making a rosemary wreath; 3. designing a healing garden; 4. packaging black date vinegar; 5. arranging a rose basket; and 6. garden party  *Group/individual*: Group  *Duration*: 1-hour session, once weekly for 6 weeks.  *Service provider:*Certified instructor (Asia Pacific Association of Therapeutic Horticulture) | N/A | Wellbeing and Quality of life:   - Mental wellbeing - Quality of life (Satisfaction with life)   Physiological/anthropometric:   - Sleep | MMAT: 4    **Low RoB** |
| Thomson et al 2020 (50)  UK | Mixed methods: Single arm before-after study | Adult mental health service users (community mental health and day centres) referred by staff to the project.  **N = 20**  Mean age (total): 53 years  [range 44-70 years] | **Prescribed/referred [into programme]**  *Intervention:*combined programme integrating horticulture and creative, arts-based therapies, situated at an inner-city art gallery. It featured outdoor activities in a park adjoining the gallery and indoor creative, arts-based activities. Sessions involved talks, demonstrations and practical activities.  Outdoor sessions included practical demonstrations followed by practical activities (e.g. use and maintaining garden tools, then cutting back herbaceous perennials). Indoor sessions included gallery visits or object handling followed by producing creative responses (e.g. looking at texture in an artwork, then using textured painting techniques to produce studies of parkland trees).  *Group/individual:* Group  *Duration:* 2-hour sessions, once weekly for 10 weeks  *Service provider:* Coordinated by the Whitworth Gallery Cultural Park Keeper; delivered by a horticultural specialist, an arts tutor and museum volunteer. | N/A | Wellbeing and Quality of life:   - Mental wellbeing | MMAT: 3    **Moderate RoB** |

ainformation regarding barriers and enablers are included in a separate section of this review

**Appendix 8: Results of quality assessment using MMAT**

| **Study ID** | **Study design/methodology** | **Screening questions** | | **Qualitative designs** | | | | | Overall quality score |
| --- | --- | --- | --- | --- | --- | --- | --- | --- | --- |
| Question clear? | Question addressed? | 1.1. | 1.2 | 1.3 | 1.4 | 1.5 |
| Mitchell, 2023 (57) | Semi structured interviews | Yes | Yes | Yes | Yes | Yes | Unsure | Yes | **** |
| Redvers et al 2024 (56) | Semi structured interviews | Yes | Yes | Yes | Yes | Yes | Yes | Yes | ***** |
| Sterckx et al 2024 | Semi structured interviews | Yes | Yes | Yes | Yes | Yes | Yes | Yes | ***** |

| **Study** | **Study design/methodology** | **Screening questions** | | **Quantitative RCT** | | | | | | Overall quality score |
| --- | --- | --- | --- | --- | --- | --- | --- | --- | --- | --- |
| Question clear? | Question addressed? | 2.1 | 2.2 | 2.3 | 2.4 | 2.5 |  | |
| Chu et al 2019 (41) | RCT | Yes | Yes | Yes | Yes | Yes | Yes | Yes | ***** | |
| Chun et al 2017 (33) | RCT | Yes | Yes | Yes | Yes | Yes | No | Yes | **** | |
| Lai et al 2018 (44) | RCT | Yes | Yes | Yes | Yes | Unsure | Yes | Unsure | *** | |
| Makizako et al 2019 (45) | RCT, three arms | Yes | Yes | Yes | Yes | No | No | No | ** | |
| Muller et al 2020 (39) | RCT | Yes | Yes | Yes | Yes | No | No | Unsure | ** | |
| Ng et al 2021 (51) | RCT | Yes | No | No | Yes | Unsure | Yes | Unsure | ** | |
| Yang et al 2022 (52) | RCT | Yes | Yes | Yes | Yes | Yes | Yes | Yes | ***** | |
| Zhou et al 2023 (40) | RCT | Yes | Yes | Yes | Yes | Yes | No | Yes | **** | |

| **Study** | **Study design/methodology** | **Screening questions** | | **Quantitative non-randomised studies** | | | | | Overall quality score |
| --- | --- | --- | --- | --- | --- | --- | --- | --- | --- |
| Question clear? | Question addressed? | 3.1 | 3.2 | 3.3 | 3.4 | 3.5 |
| Bassi et al 2018 (43) | Cross-over design | Yes | Yes | Yes | Yes | No | Yes | Yes | **** |
| Jueng et al 2022 (14) | Quasi experimental design | Yes | Yes | Yes | Yes | Unsure | Yes | Yes | **** |
| Kolster et al 2023 (34) |  | Yes | Yes | Yes | Yes | No | Yes | Unsure | *** |
| Shen et al 2022 (49) | Quasi-experimental, pre and post, single group (within subjects) | Yes | Yes | Yes | Yes | Yes | No | Yes | **** |
| Sung et al 1993 (35) |  | Yes | Yes | Yes | Yes | Yes | No | Yes | **** |
| Yao et al 2017 (48) |  | Yes | Yes | Yes | Yes | Yes | Yes | No | **** |

|  | ***Screening Questions*** | | **Qualitative** | | | | | **Quantitative RCT** | | | | | **Quantitative NRS** | | | | | **Quantitative Descriptive** | | | | | **Mixed Methods** | | | | | **Score** |
| --- | --- | --- | --- | --- | --- | --- | --- | --- | --- | --- | --- | --- | --- | --- | --- | --- | --- | --- | --- | --- | --- | --- | --- | --- | --- | --- | --- | --- |
|  | *Question clear?* | *Question addressed* | 1.1 | 1.2 | 1.3 | 1.4 | 1.5 | 2.1 | 2.2 | 2.3 | 2.4 | 2.5 | 3.1 | 3.2 | 3.3 | 3.4 | 3.5 | 4.1 | 4.2 | 4.3 | 4.4 | 4.5 | 5.1 | 5.2 | 5.3 | 5.4 | 5.5 |  |
| Carreño et al 2023 (36) | Y | U | N | N | N | N | N |  |  |  |  |  | Y | Y | N | Y | Y |  |  |  |  |  | N | N | N | N | N | 0 |
| (Department of Health and Social Care, 2023) (53) | Y | Y | Y | Y | Y | Y | Y |  |  |  |  |  |  |  |  |  |  | N | Y | U | U | Y | Y | N | N | Y | N | ** |
| Maund et al 2019 (37) | Y | Y | Y | Y | Y | Y | Y |  |  |  |  |  | Y | Y | Y | N | Y |  |  |  |  |  | U | Y | Y | Y | U | *** |
| McCaffrey et al 2011 (38) | Y | Y | Y | Y | N | N | N | U | Y | Y | Y | U |  |  |  |  |  |  |  |  |  |  | Y | N | N | Y | N | ** |
| Okvat et al 2012 (46) | Y | Y | Y | Y | Y | Y | Y | U | U | Y | Y | U |  |  |  |  |  |  |  |  |  |  | Y | Y | Y | Y | N | ** |
| Perkins et al 2011 (47) | Y | Y | N | N | N | N | N |  |  |  |  |  | Y | Y | Y | N | U |  |  |  |  |  | N | N | U | N | N | 0 |
| Smock et al 2024 (54) | Y | Y | Y | U | Y | Y | U |  |  |  |  |  |  |  |  |  |  | Y | U | Y | Y | U | Y | Y | Y | Y | U | *** |
| Thomson et al 2020 (50) | Y | Y | Y | Y | Y | Y | Y |  |  |  |  |  | U | Y | Y | N | Y |  |  |  |  |  | Y | Y | U | Y | N | *** |
| Tse 2010 (42) | Y | Y | Y | N | Y | Y | N |  |  |  |  |  | Y | Y | Y | N | Y |  |  |  |  |  | N | N | N | U | N | 0 |

**Appendix 9: Study findings - Effectiveness of Activities in Nature**

BDI - Beck Depression Inventory; BMI – body mass index; DBP – diastolic blood pressure; GAD-7 - Generalised Anxiety Disorder Scale; GDS - Geriatric Depression Scale; GPAQ Global Physical Activity Questionnaire; HAM-D17 - Hamilton Depression Rating Scale; K10 – Kessler Psychological Distress Scale; MVPA – Moderate-to-vigorous physical activity; PANAS - Positive and Negative Affect Schedule; POMS – Profile of moods states; PSS - Perceived Stress Scale; QoL – Quality of life; SD – standard deviation; SE – standard error; SF-12 12-Item Short Form Survey; SBP – systolic blood pressure; STAI - Spielberger State-Trait Anxiety Inventory; U CARR - Carratelli units WEMWBS - Mental wellbeing Warwick-Edinburgh Mental Well-Being Scale; WHO5 - WHO Five Well-Being Index.

| **Study**overall RoB | **Study design**  Prescribed/ not prescribed | **Outcome definition** | **Intervention arm (number at follow-up)** | **Follow-up timepoint**  **Result per arm** | **Intervention effect: between group difference (where reported)** | **Summary conclusion** |
| --- | --- | --- | --- | --- | --- | --- |
| **Wellbeing and Quality of life** | | | | | | |
| **Quality of life** | | | | | | |
| Sung et al 2012 (35)  Republic of Korea    MMAT: 4 | Quasi-experimental  *Not Referred* | QoL: Overall score (23 questions, 5-point Likert scale) higher is better | Forest therapy (n = 28) | 8 weeks (longest follow up)  Median change (IQR):  42 (31, 48), p<0.00001 | **p < 0.001**  ES not reported | Forest therapy shows a significantly greater benefit in improving quality of life compared to educational materials. |
| Printed educational materials (n = 28) | 8 weeks (longest follow up)  Median change (IQR):  9 (-1.75, 34.5), p = 0.03 |
| **Mental wellbeing** | | | | | | |
| Carreño et al 2023 (36)  Spain    MMAT: 4 | Mixed methods: quasi-experimental crossover  *Not Referred* | Overall Mood - POMS (overall score), higher is worse | (n = 16) | Immediately post-activity  Rate (95% CI) | Overall adj model:  **p = 0.04**  ES not reported  *Post-hoc comparisons: all p≥0.07* | Snorkelling significantly improved overall mood compared to control.  Other blue space interventions also resulted in better mood scores than control, but associations were not significant. |
| Walking | 0.96 (0.92, 1.01) |
| Beach (bathing) | 0.95 (0.90, 1.00) |
| Snorkelling | 0.94 (0.89, 0.99) |
| Control: indoor relaxing | 0.98 (0.94, 1.03) |
| Kolster et al 2023 (34)    Finland    MMAT: 3 | Quasi-experimental  *Referred* | WEMWBS, higher is better *(primary outcome)* | Nature prescription (N=33) | 8 weeks (end of intervention)  Mean change (95% CI): 3.15 (0.87, 5.43), **p = 0.008** | p = 0.17  ES not reported | Whilst mental wellbeing improved significant from baseline in the nature group only, there was no significant difference in wellbeing change between the nature and exercise programs |
| Exercise program (N=21) | 8 weeks (end of intervention)  Mean change (95% CI) 0.76 (-1.82, 3.34), p = 0.545 |
| Sung et al 2012 (35)    Republic of Korea    MMAT: 4 | Quasi-experimental  *Not Referred* | QoL: Mental dimension, higher is better | Forest therapy (n = 28) | 8 weeks (longest follow up)  Median change (IQR):  16 (11.5, 18.25) | **p < 0.001**  ES not reported | Forest therapy shows a significantly greater benefit in improving mental wellbeing compared to educational materials. |
| Printed educational materials (n = 28) | 8 weeks (longest follow up)  Median change (IQR):  0 (-0.75, 13) |
| Maund et al 2019 (37)    UK    MMAT: 5 | Mixed methods: single arm before-after  *Referred* | WEMWBS, higher is better | Wetland nature-based intervention (n = 16) | Mean (SE)  Pre-intervention: 37 (2.79)  Post-intervention (6 weeks): 41 (4.31)  *z*= -2.60, p = 0.009 | N/A | A wetland nature-based intervention shows significant improvement in mental wellbeing from baseline |
| **Mental health** | | | | | | |
| **General (perceived) mental health** | | | | | | |
| Kolster et al 2023 (34)    Finland    MMAT: 3 | Quasi-experimental  *Referred* | Perceived mental health (range 1-5), higher is better | Nature prescription (N=36) | 8 weeks (end of intervention)  Mean change (95% CI): 0.39 (0.16, 0.62), **p = 0.002** | NR | Mental wellbeing improved significantly in the nature prescription group only, no change was noted in the exercise group (*no statistical comparison between groups was conducted*). |
| Exercise program (N=24) | 8 weeks (end of intervention)  Mean change (95% CI): 0.04 (−0.25, 0.33), p = 0.77 |
| **Depression** | | | | | | |
| Chun et al 2017 (33)    Republic of Korea    MMAT: 4 | RCT  *Not Referred* | BDI, higher is worse | Forest therapy (n = 30) | After intervention  Mean change (SD):  -13.0 (5.4), p<0.001 | **p < 0.001**  ES not reported | Forest therapy shows a significant benefit at reducing depression compared to a similar intervention in an urban area. |
| Urban group (n = 29) | After intervention  Mean change (SD):  -0.3 (1.6), p = 0.217 |
| HAM-D17, higher is worse | Forest therapy (n = 30) | After intervention  Mean change (SD):  -5.5 (3.7), p<0.001 | **p < 0.001**  ES not reported |
| Urban group (n = 29) | After intervention  Mean change (SD):  -0.1 (1.1), p = 0.703 |
| Zhou et al 2023 (40)    USA    MMAT: 3 | Mixed methods: RCT  *Not Referred* | GDS, higher score is worse. | Group walking/guided imagery (n = 13) – *nature prescription* | Mean (SD)  Pre-intervention: 17.52 (10.31)  Post-intervention (6 weeks): 7.73 (4.89) | Repeat measures ANOVA: F2, 36= 2.57, p = 0.09 | Whilst depression significantly reduced post-intervention across all treatment arms, differences between arms were not statistically significant. |
| Independent walking (n = 13) – *exercise intervention* | Mean (SD)  Pre-intervention: 28.41 (18.18)  Post-intervention (6 weeks): 12.11 (5.08) |
| Art therapy (n = 13) | Mean (SD)  Pre-intervention: 27.00 (9.65)  Post-intervention (6 weeks): 11.60 (6.11) |
|  | *Repeat measures ANOVA:****F1, 36= 56.24,******p = 0.000*** |
| Carreño et al 2023 (36)      MMAT: 4 | Mixed methods: quasi-experimental crossover  *Not Referred* | POMS: Depression score, higher is worse | (n = 16) | Immediately post-activity  Rate (95% CI) | Overall model:  p = 0.86  ES not reported | Blue space interventions did not significantly improve depression compared to control. |
| Walking | NR |
| Beach (bathing) | NR |
| Snorkelling | NR |
| Control: indoor relaxing | NR |
| **Anxiety** | | | | | | |
| Chun et al 2017 (33)    Republic of Korea    MMAT: 4 | RCT  *Not Referred* | STAI, higher is worse | Forest therapy (n = 30) | After intervention  Mean change (SD):  -10.5 (9.7), p<0.001 | **p < 0.001**  ES not reported | Forest therapy shows a significant benefit at reducing anxiety compared to a similar intervention in an urban area. |
| Urban group (n = 29) | After intervention  Mean change (SD):  10.0 (5.0), p<0.001, *significantly worse anxiety* |
| Carreño et al 2023 (36)    Spain    MMAT: 4 | Mixed methods: quasi-experimental crossover  *Not Referred* | POMS: Tension-anxiety score, higher is worse  *(unease, tension, and anxiety)* | (n = 16) | Immediately post-activity  Rate (95% CI) | Overall adj model:  **p = 0.02**  ES not reported  *Post-hoc comparisons:*   - *Control-beach:****p = 0.02*** - *Control-snorkel:****p = 0.02*** - *All other comparisons:  p≥0.18* | Compared to control, bathing at the beach and snorkelling significantly improved anxiety. |
| Walking | 0.70 (0.57–0.86) |
| Beach (bathing) | 0.60 (0.49–0.74) |
| Snorkelling | 0.60 (0.48–0.74) |
| Control: indoor relaxing | 0.77 (0.65–0.95) |
| Maund et al 2019 (37)      MMAT: 5 | Mixed methods: single arm before-after  *Referred* | GAD-7, higher is worse | Wetland nature-based intervention (n = 16) | Mean (SE)  Pre-intervention: 13.27 (1.54)  Post-intervention (6 weeks): 10.28 (4.31)  *z*= -3.02, p = 0.002 | N/A | A wetland nature-based intervention shows significant improvement in anxiety from baseline |
| **Stress** | | | | | | |
| Maund et al 2019 (37)      MMAT: 5 | Mixed methods: single arm before-after  *Referred* | PSS, higher is worse | Wetland nature-based intervention (n = 16) | Mean (SE)  Pre-intervention: 24.31 (2.54)  Post-intervention (6 weeks): 22.35 (1.47)  *z*= -2.04, p = 0.041 | N/A | A wetland nature-based intervention shows significant improvement in perceived stress from baseline |
| **Positive affect** | | | | | | |
| McCaffrey et al 2011 (38)    USA    MMAT: 3 | Mixed methods: RCT  *Not Referred* | Positive-emotion word use | Group walking/guided imagery (n = 13) – *nature prescription* | NR | Repeat measures ANOVA: NS  ES not reported | Whilst use of words that reflected positive emotion increased significantly post-intervention across all intervention arms, no differences were found between walking interventions and art therapy. |
| Independent walking (n = 13) – *exercise intervention* | NR |
| Art therapy (n = 13) | NR |
|  | *Repeat measures ANOVA:****F1, 36= 8.98, p < 0.05*** |
| Maund et al 2019 (37)    UK    MMAT: 5 | Mixed methods: single arm before-after  *Referred* | PANAS: positive affect, higher is better | Wetland nature-based intervention (n = 16) | Mean (SE)  Pre-intervention: 26 (2.64)  Post-intervention (6 weeks): 30.57 (3.08)  *z*= -2.49, p = 0.012 | N/A | A wetland nature-based intervention shows significant improvement in positive affect from baseline |
| **Negative affect** | | | | | | |
| McCaffrey et al 2011 (38)    USA    MMAT: 3 | Mixed methods: RCT  *Not Referred* | Negative-emotion word use | Group walking/guided imagery (n = 13) – *nature prescription* | NR | Repeat measures ANOVA: NS  ES not reported | Whilst use of words that reflected negative emotion decreased significantly post-intervention across all intervention arms, no significant differences were found between walking interventions and art therapy. |
| Independent walking (n = 13) – *exercise intervention* | NR |
| Art therapy (n = 13) | NR |
|  | *Repeat measures ANOVA:****F1, 36= 12.34, p ≤ 0.01*** |
| Maund et al 2019 (37)      MMAT: 5 | Mixed methods: single arm before-after  *Referred* | PANAS: negative affect, higher is worse | Wetland nature-based intervention (n = 16) | Mean (SE)  Pre-intervention: 28.63 (2.99)  Post-intervention (6 weeks): 27.71 (3.66)  *z*= -2.24, p = 0.025 | N/A | A wetland nature-based intervention shows significant reduction in negative affect from baseline |
| **Psychological** | | | | | | |
| **Fatigue (mental)** | | | | | | |
| Carreño et al 2023 (36)    Spain     MMAT: 4 | Mixed methods: quasi-experimental crossover  *Not Referred* | POMS: Fatigue score, higher is worse  *(levels of tiredness and inertia)* | (n = 16) | Immediately post-activity  Rate (95% CI) | Overall adj model:  **p = 0.01**  ES not reported  *Post-hoc comparisons:*   - *Control-walk:****p = 0.03*** - *Walk-beach:****p = 0.01*** - *Walk-snorkel:****p = 0.01*** - *All other comparisons: p≥0.84* | Control, bathing and snorkelling significantly reduced fatigue compared to walking. |
| Walking | 1.21 (0.74, 1.97) |
| Beach (bathing) | 0.87 (0.53, 1.41) |
| Snorkelling | 0.85 (0.52, 1.38) |
| Control: indoor relaxing | 0.90 (0.55, 1.47) |
| **Social** | | | | | | |
| **Overall social dimensions** | | | | | | |
| Sung et al 2012 (35)    Republic of Korea    MMAT: 4 | Quasi-experimental  *Not referred or prescribed* | QoL: Social dimension, higher is better | Forest therapy (n = 28) | 8 weeks (longest follow up)  Median change (IQR):  3.5 (-6.5, 8) | **p < 0.001**  ES not reported | Forest therapy shows a significantly greater benefit in improving social dimension in life compared to educational materials. |
| Printed educational materials (n = 28) | 8 weeks (longest follow up)  Median change (IQR):  0 (-7, 7.75) |
| **Physiological/anthropometric** | | | | | | |
| **Systolic blood pressure** | | | | | | |
| Carreño et al 2023 (36)    Spain     MMAT: 4 | Mixed methods: quasi-experimental crossover  *Not Referred* | Systolic blood pressure (SBP), mmHg | (n = 16) | Immediately post-activity | Overall adj model: p = 0.20  ES not reported | Blue space interventions did not significantly improve systolic blood pressure (SBP) compared to control. |
| Walking | NR |
| Beach (bathing) | NR |
| Snorkelling | NR |
| Control: indoor relaxing | NR |
| Sung et al 2012 (35)    Republic of Korea    MMAT: 4 | Quasi-experimental  *Not Referred* | Systolic BP mm Hg | Forest therapy (n = 28) | Day 3 (immediately after program)  Mean change (SD):  -10.4 (10.3) | **p = 0.03**  ES not reported | Compared to printed materials, forest therapy led to a significantly greater reduction in systolic blood pressure immediately after completing the program. |
| Printed educational materials (n = 28) | Day 3 (immediately after program)  Mean change (SD):  -1.7 (18.3) |
| Forest therapy (n = 28) | 8 weeks (longest follow up)  Mean change (SD):  -11.5 (19.9), p<0.001 | p = 0.46  ES not reported | Compared to printed materials, forest therapy did not lead to a significantly greater reduction in systolic blood pressure at 8 weeks follow up. |
| Printed educational materials (n = 28) | 8 weeks (longest follow up)  Mean change (SD):  -12.0 (9.2), p<0.005 |
| **Diastolic blood pressure** | | | | | | |
| Carreño et al 2023 (36)    Spain    MMAT: 4 | Mixed methods: quasi-experimental crossover  *Not Referred* | Diastolic blood pressure (DBP), mmHg | (n = 16) | Immediately post-activity | Overall adj model:  p = 0.78  ES not reported | Blue space interventions did not significantly improve DBP compared to control. |
| Walking | NR |
| Beach (bathing) | NR |
| Snorkelling | NR |
| Control: indoor relaxing | NR |
| Sung et al 2012 (35)    Republic of Korea    MMAT: 4 | Quasi-experimental  *Not Referred* | Diastolic BP mm Hg | Forest therapy (n = 28) | Day 3 (immediately after program)  Mean change (SD):  -0.1 (7.8), NS | p = 0.34  ES not reported | Neither forest therapy nor the educational materials showed a significant improvement in DBP immediately after completing the program. |
| Printed educational materials (n = 28) | Day 3 (immediately after program)  Mean change (SD):  1.3 (13.3), NS |
| Forest therapy (n = 28) | 8 weeks (longest follow up)  Mean change (SD):  -0.1 (7.8), NS | p = 0.34  ES not reported | Neither forest therapy nor the educational materials showed a significant improvement in DBP at 8 weeks follow up. |
| Printed educational materials (n = 28) | 8 weeks (longest follow up)  Mean change (SD):  1.3 (13.3), NS |
| **Sleep** | | | | | | |
| Carreño et al 2023 (36)    Spain    MMAT: 4 | Mixed methods: quasi-experimental crossover  *Not Referred* | Sleep quality index | (n = 16) | Immediately post-activity | Overall adj model:  p = 0.62  ES not reported | Blue space interventions did not significantly affect sleep quality compared to control. |
| Walking | NR |
| Beach (bathing) | NR |
| Snorkelling | NR |
| Control: indoor relaxing | NR |
| Kolster et al 2023 (34)    Finland    MMAT: 3 | Quasi-experimental  *Referred* | Total sleep time, mins | Nature prescription (n=36) | 8 weeks (end of intervention)  Mean change (95% CI): 0.47 (0.22, 0.72),**p<0.001** | NR | Total time asleep significantly increased in both groups following their respective interventions. Increases were similar, but no statistical comparison between groups was conducted. |
| Exercise program (n=24) | 8 weeks (end of intervention)  Mean change (95% CI): 0.42 (0.2, 0.63), **p<0.001** |
| Kolster et al 2023 (34)    Finland    MMAT: 3 | Quasi-experimental  *Referred* | Perceived quality of sleep (range 1-5) | Nature prescription (n=36) | 8 weeks (end of intervention)  Mean change (95% CI): 3.5 (1), *z* = -3.78, **p<0.001** | NR | Perceive sleep quality significantly improved in both groups following their respective interventions. Improvements were similar but no statistical comparison between groups was conducted. |
| Exercise program (n=24) | 8 weeks (end of intervention)  Mean change (95% CI): 3.3 (1)0.42 (0.2, 0.63), **p<0.001** |

**Appendix 10: Effectiveness of Green space exercise interventions**

BMI – body mass index; DBP – diastolic blood pressure; EFI - Exercise feeling inventory; GPAQ Global Physical Activity Questionnaire; IQR – interquartile range; K10 – Kessler Psychological Distress Scale; MVPA – Moderate-to-vigorous physical activity; NS – non-significant; PES – physical exhaustion subscale; QoL – Quality of life; SF-12 12-Item Short Form Survey; SBP – systolic blood pressure; WEMWBS - Mental wellbeing Warwick-Edinburgh Mental Well-Being Scale; WHO5 - WHO Five Well-Being Index

| **Study**  Overall risk of bias | **Study design**  Prescribed/ not prescribed | **Outcome definition** | **Intervention arm (number at follow-up)** | **Follow-up timepoint**  **Result per arm** | **Intervention effect: between group difference (where reported)** | **Summary conclusion** |
| --- | --- | --- | --- | --- | --- | --- |
| **Wellbeing and Quality of life** | | | | | | |
| **General wellbeing** | | | | | | |
| Muller et al 2020 (39)    Singapore    MMAT: 2 | RCT  *Prescribed* | General health (SF-12, 1-item, range 1-5) | Park prescription intervention (n=71) | Mean (sd)  Baseline: 2.8 (0.8), n=80  6 months: 2.8 (0.7) | Adj mean difference: -0.1 (95% CI: -0.3, 0.2), p = 0.631 | Neither park prescription nor control improved general health, with no difference between the two. |
| Control: usual care (n=74) | Mean (sd)  Baseline: 2.8 (0.8), n=80  6 months: 2.8 (0.9) |
| Muller et al 2020 (39)    Singapore    MMAT: 2 | RCT  *Prescribed* | WHO5 total (range 0-100), higher is better | Park prescription intervention (n=71) | Mean (sd)  Baseline: 58.1 (22.1), n=80  6 months: 56.6 (20.1) | Adj mean difference: -1.0 (95% CI: -6.9, 4.8), p = 0.727 | Neither park prescription nor control improved wellbeing, with no difference between the two. |
| Control: usual care (n=74) | Mean (sd)  Baseline: 58.5 (22.6), n=80  6 months: 57.6 (20.4) |
| **Mental health** | | | | | | |
| **Depression** | | | | | | |
| McCaffrey et al 2011 (38)    USA    MMAT: 2 | Mixed methods: RCT  *Not Referred* | GDS, higher score is worse. | Group walking/guided imagery (n = 13) – *nature prescription* | Mean (SD)  Pre-intervention: 17.52 (10.31)  Post-intervention (6 weeks): 7.73 (4.89) | Repeat measures ANOVA: F2, 36= 2.57, p = 0.09 | Whilst depression reduced post-intervention across all treatment arms, there were no significant differences in improvement between walking interventions and art therapy. |
| Independent walking (n = 13) – *exercise intervention* | Mean (SD)  Pre-intervention: 28.41 (18.18)  Post-intervention (6 weeks): 12.11 (5.08) |
| Art therapy (n = 13) | Mean (SD)  Pre-intervention: 27.00 (9.65)  Post-intervention (6 weeks): 11.60 (6.11) |
|  | *Repeat measures ANOVA:****F1, 36= 56.24,******p = 0.000*** |
| **Distress** | | | | | | |
| Muller et al 2020 (39)    Singapore    MMAT: 2 | RCT  *Prescribed* | K10 total (range 10-50), higher is better | Park prescription intervention (n=71) | Mean (sd)  Baseline: 12.7 (2.9), n=80  6 months: 14.0 (3.9) | Adj mean difference: -0.7 (95% CI: -1.9, 0.6), p = 0.277 | Compared to control, park prescription did not lead to a significantly greater improvement in K10 QoL |
| Control: usual care (n=74) | Mean (sd)  Baseline: 13.4 (4.1), n=80  6 months: 15.0 (4.9) |
| **Positive affect** | | | | | | |
| McCaffrey et al 2011 (38)  USA    MMAT: 2 | Mixed methods: RCT  *Not Referred* | Positive-emotion word use | Group walking/guided imagery (n = 13) – *nature prescription* | NR | Repeat measures ANOVA: NS  ES not reported | Whilst use of words that reflected positive emotion increased significantly post-intervention across all intervention arms, there were no significant differences in improvement between interventions. |
| Independent walking (n = 13) – *exercise intervention* | NR |
| Art therapy (n = 13) | NR |
|  | *Repeat measures ANOVA:****F1, 36= 8.98, p < 0.05*** |
| **Negative affect** | | | | | | |
| McCaffrey et al 2011 (38)    USA    MMAT: 2 | Mixed methods: RCT  *Not Referred* | Negative-emotion word use | Group walking/guided imagery (n = 13) – *nature prescription* | NR | Repeat measures ANOVA: NS  ES not reported | Whilst use of words that reflected negative emotion decreased significantly post-intervention across all interventions, there were no significant differences in improvement between interventions. |
| Independent walking (n = 13) – *exercise intervention* | NR |
| Art therapy (n = 13) | NR |
|  | *Repeat measures ANOVA:****F1, 36= 12.34, p ≤ 0.01*** |
| **Physical activity** | | | | | | |
| **Physical activity measures (self-report or objective)** | | | | | | |
| Muller et al 2020 (39)    Singapore  MMAT: 2 | RCT  *Prescribed* | Objective 10 min bouted MVPA, min/week (*primary outcome*) | Park prescription intervention (n=71) | Mean (sd)  Baseline: NR  6 months: 114.5 (121.3) | Adj mean difference: 0.6 (95% CI: -46.5, 47.6), p = 0.981 | A very small and non-significant difference in physical activity (10 min bouted MPVA) was seen between park prescription and usual care arms. |
| Control: usual care (n=74) | Mean (sd)  Baseline: NR  6 months: 110.1 (150.9) |
| Muller et al 2020 (39)    Singapore    MMAT: 2 | RCT  *Prescribed* | GPAQ: total MVPA, min/week | Park prescription intervention (n=71) | Mean (sd)  Baseline: 475.7 (618.1), n = 80  6 months: 814.9 (860.8) | Adj mean difference: 130.2 (95% CI: -129.1, 389.5), p = 0.323 | Park prescription showed a larger improvement in total moderate-to-vigorous physical activity (MPVA) compared to usual care, but this was not statistically significant. |
| Control: usual care (n=74) | Mean (sd)  Baseline: 409.8 (437.2), n = 80  6 months: 662.4 (775.1) |
| Muller et al 2020 (39)    Singapore    MMAT: 2 | RCT  *Prescribed* | Physical activity in parks, min/week | Park prescription intervention (n=71) | Mean (sd)  Baseline: 130.3 (261.8), n = 80  6 months: 333.0 (499.3) | Adj mean difference: 190.3 (95% CI 59.7, 320.9), **p = 0.005** | Park prescription resulted in a significantly greater increase in physical activity conducted in a park compared to usual care. |
| Control: usual care (n=74) | Mean (sd)  Baseline: 132.7 (296.6), n = 80  6 months: 140.5 (270.7) |
| **Active engagement in physical activity** | | | | | | |
| Zhou et al 2023 (40)      MMAT: 4 | RCT  *Not Referred* | EFI: active engagement, higher is better | Outdoor rehabilitation exercise programme (n=11) | Immediately post-exercise session (1 off)  Median (IQR)  Change from baseline: 2 (0.75, 3.3), d = 1.28, p = 0.074 | Cohen’s d = 0.43, p = 0.529 | After a single exercise session there were small improvements in both groups in engagement in physical activity, the difference between groups was not |
| Indoor rehabilitation exercise programme (n=11) | Immediately post-exercise session (1 off)  Median (IQR)  Change from baseline: 1 (-1, 3), d = 1.12, p = 0.103 |
| **Physical function** | | | | | | |
| **Physical exhaustion (fatigue)** | | | | | | |
| Zhou et al 2023 (40)      MMAT: 4 | RCT  *Not Referred* | EFI: physical exhaustion subscale (PES), higher is worse | Outdoor rehabilitation exercise programme (n=11) | Immediately post-exercise session (1 off)  Median (IQR)  Change from baseline: 0 (-1, 1), d = 0, p = 1.0 | Cohen’s d = 1.76, **p = 0.035** | After a single exercise session there was a significant increase in physical exhaustion in the indoors group, but no change in the outdoors group. The difference between groups was significant i.e. exercise outdoors results in less physical fatigue than similar exercise indoors. |
| Indoor rehabilitation exercise programme (n=11) | Immediately post-exercise session (1 off)  Median (IQR)  Change from baseline: 2 (0, 5.8), **d = 1.81, p = 0.026** |
| **Physiological/anthropometric** | | | | | | |
| **Systolic blood pressure** | | | | | | |
| Muller et al 2020 (39)    Singapore    MMAT: 2 | RCT  *Prescribed* | Systolic blood pressure (SBP), mmHg | Park prescription intervention (n=71) | Mean (sd)  Baseline: 117.8 (11.6), n=80  6 months: 113.4 (12.0) | Adj mean difference: 0.5 (95% CI: -2.9, 3.9), p = 0.770 | Small reductions in SBP were found in both arms at 6 months but the difference between park prescription and usual care was very small and not statistically significant. |
| Control: usual care (n=74) | Mean (sd)  Baseline: 118.2 (11.6), n=80  6 months: 113.1 (12.9) |
| Zhou et al 2023 (40)    China    MMAT: 4 | RCT  *Not Referred* | Systolic blood pressure, mmHG | Outdoor rehabilitation exercise programme (n=11) | Immediately post-exercise session (1 off)  Mean (sd)  Change from baseline: 0.8 (6.7), d = 0.05, p = 0.719 | Cohen’s d = 0.28, p = 0.532 | Small increases in SBP were observed immediately after the single exercise sessions both indoors and outdoors. Though slightly larger increase (less beneficial) was seen in the indoor arm, no significant difference between groups was found. |
| Indoor rehabilitation exercise programme (n=11) | Immediately post-exercise session (1 off)  Mean (sd)  Change from baseline: 2.3 (3.6), d = 2.49, p = 0.71 |
| **Diastolic blood pressure** | | | | | | |
| Muller et al 2020 (39)    Singapore    MMAT: 2 | RCT  *Prescribed* | Diastolic blood pressure (DBP), mmHg | Park prescription intervention (n=71) | Mean (sd)  Baseline: 71.5 (7.7), n=80  6 months: 71.2 (7.3) | Adj mean difference: -0.4 (95% CI: -2.8, 2.0), p = 0.727 | A very small and non-significant difference in DBP at 6 months was seen between park prescription and usual care arms. |
| Control: usual care (n=74) | Mean (sd)  Baseline: 58.5 (22.6), n=80  6 months: 57.6 (20.4) |
| Muller et al 2020 (39)      MMAT: 4 | RCT  *Not Referred* | Diastolic blood pressure, mmHG | Outdoor rehabilitation exercise programme (n=11) | Change from baseline, mean (SD): -1.6 (3.6), d = 0.19, p = 0.20 | Cohen’s d = 0.36, **p = 0.008** | An outside exercise program showed a small drop in DBP, whereas the indoor programme showed an increase in DBP. The difference was statistically significant in favour of outdoor exercise. |
| Indoor rehabilitation exercise programme (n=11) | Change from baseline, mean (SD): 2.9 (3.0), d = 0.44, **p = 0.014** |

| **Body mass index** | | | | | | |
| --- | --- | --- | --- | --- | --- | --- |
| Muller et al 2020 (39)  Singapore    MMAT: 2 | RCT  *Prescribed* | BMI, kg/m2 | Park prescription intervention (n=71) | Mean (sd)  Baseline: 24.2 (4.1), n=80  6 months: 24.2 (4.2) | Adj mean difference: -0.3 (95% CI: -7.0, 0.0), p = 0.074 | A very small and non-significant difference in BMI at 6 months was seen between park prescription and usual care arms. |
| Control: usual care (n=74) | Mean (sd)  Baseline: 23.6 (4.1), n=80  6 months: 23.8 (4.0) |

**Appendix 11: Effectiveness of indoor gardening**

ES – effect size; GDS-15 - 15-item Geriatric Depression Scale; GEE - Generalised estimating equation;

| **Study**  Overall risk of bias | **Study design**  Referred/ not Referred | **Outcome definition** | **Intervention arm (number at follow-up)** | **Follow-up timepoint**  **Result per arm** | **Intervention effect: between group difference (where reported)** | **Summary conclusion** |
| --- | --- | --- | --- | --- | --- | --- |
| **Wellbeing and Quality of life** | | | | | | |
| **Quality of life** | | | | | | |
| Tse, 2010  (42)  China (Hong Kong)    MMAT: 4 | Mixed methods: quasi experimental  *Not Referred* | Life Satisfaction Index-A, higher is better | Indoor gardening sessions (n = 26) | 8 weeks (end of intervention)  Mean (SD)  Baseline: 11.73 (3.24)  8 weeks: 15.73 (1.71) | Mann-Whitney U-test  Baseline: p = 0.39  8 weeks: **p < 0.001**  ES not reported | An indoor gardening intervention resulted in a significantly greater improvement in life satisfaction than usual care. |
| Control: usual care (n = 27) | 8 weeks (end of intervention)  Mean (SD)  Baseline: 11.56 (2.33)  8 weeks: 11.67 (2.25) |
| Bassi et al 2018 (43)    Italy    MMAT: 4 | Quasi-experimental, crossover  *Not Referred* | Self-satisfaction | Indoor horticultural activity (n = 11) | Follow-up timepoint: NR (each activity cycle lasted 6 weeks, so potentially 12 weeks overall)    Mean scores could not be extracted | ES could not be extracted | Both type of activities improved self-satisfaction compared to baseline, but horticulture seems to have more benefit in terms of satisfaction. |
| Indoor occupational activity (n = 11)  *Nb: 2 groups: Group 1 - horticulture then occupational activities (n = 4); Group 2 – occupational then horticultural activities (n = 7)* |
| **Mental health** | | | | | | |
| **Depression** | | | | | | |
| Chu et al 2019 (41)    Taiwan    MMAT: 4 | RCT  *Not Referred* | GDS-15, higher is worse | Indoor horticultural activities (n = 75) | 8 weeks (end of intervention)  Mean change (SD):  -4.60 (0.31), **p <0.001** | GEE b (mean difference over the time period) = -7.240, SE = 0.4776, **p<0.001** | Indoor horticultural activities showed a decrease in depression, whereas usual care showed on increase in depression. The difference was statistically significant in favour of indoor horticultural activity program. |
| Control: routine care (n = 75) | 8 weeks (end of intervention)  Mean change (SD):  2.64 (0.36), **p<0.001** |
| **Psychological** | | | | | | |
| **Loneliness** | | | | | | |
| Chu et al 2019 (41)    Taiwan    MMAT: 5 | RCT  *Not Referred* | 20-item UCLA Loneliness Scale v3, higher is worse | Indoor horticultural activities (n = 75) | 8 weeks (end of intervention)  Mean change (SD): 6.51 (0.71), **p <0.001** | GEE b (mean difference over the time period) = -9.680, SE = 1.861, **p<0.001** | Indoor horticultural activities led to significantly greater improvement in loneliness compared to routine care. |
| Control: routine care (n = 75) | 8 weeks (end of intervention)  Mean change (SD):  3.17 (0.95),**p<0.001** |
| Tse, 2010   (42)  China (Hong Kong)    MMAT: 4 | Mixed methods: quasi experimental  *Not Referred* | 20-item UCLA Loneliness Scale revised, higher is worse | Indoor gardening sessions (n = 26) | 8 weeks (end of intervention)  Mean (SD)  Baseline: 41.38 (8.18)  8 weeks: 35.46 (7.54) | Mann-Whitney U-test  Baseline: p = 0.32  8 weeks: **p < 0.001**  ES not reported | An indoor gardening intervention resulted in a significantly greater reduction in loneliness compared to usual care. |
| Control: usual care (n = 27) | 8 weeks (end of intervention)  Mean (SD)  Baseline: 42.56 (2.80)  8 weeks: 42.44 (2.98) |
| **Social** | | | | | | |
| **Social network** | | | | | | |
| Tse, 2010   (42)  China (Hong Kong)    MMAT: 4 | Mixed methods: quasi experimental  *Not Referred* | Lubben Social Network Scale, higher is better | Indoor gardening sessions (n = 26) | 8 weeks (end of intervention)  Mean (SD)  Baseline: 19.27 (7.96)  8 weeks: 24.77 (6.69) | Mann-Whitney U-test  Baseline: p = 0.77  8 weeks: **p < 0.001**  ES not reported | Indoor gardening resulted in a significantly greater improvement of social networking compared to usual care. |
| Control: usual care (n = 27) | 8 weeks (end of intervention)  Mean (SD)  Baseline: 18.26 (4.15)  8 weeks: 18.33 (4.16) |
| **Sociability** | | | | | | |
| Bassi et al 2018 (43)    Italy    MMAT: 4 | Quasi-experimental, crossover  *Not Referred* | Sociability (desire to socialise) | Indoor horticultural activity (n = 11) | Follow-up timepoint: NR (each activity cycle lasted 6 weeks, so potentially 12 weeks overall)  Mean scores could not be extracted | ES could not be extracted | Both type of activities improved sociability compared to baseline, but no significant difference between arms was found. |
| Indoor occupational activity (n = 11)  *Nb: 2 groups: Group 1 - horticulture then occupational activities (n = 4); Group 2 – occupational then horticultural activities (n = 7)* |
| **Spiritual** | | | | | | |
| **Sense of coherence** | | | | | | |
| Jueng et al 2022 (14)    Taiwan    MMAT: 4 | Cluster RCT  *Not Referred* | Antonovsky’s 13-item Sense of Coherence Scale (Chinese version), higher is better | Indoor desktop gardening (n = 49) | 12 weeks (1 week after end of intervention)  Mean (SD)  Baseline: 50.45 (6.07)  12-weeks: 56.37 (7.20)  Mean difference (SD) from baseline: -5.91 (3.78), t = -10.94, **p<0.001** | GEE Wald b = 0.24 (SE 0.13), p=0.071 | Although group 1 shows a larger improvement compared with group 2, the difference between groups across all time-points (baseline, 4, 8, and 12 weeks) was not significant. |
| Control: Traditional activities (n = 37) | 12 weeks (1 week after end of intervention)  Mean (SD)  Baseline: 52.91 (6.00)  12-weeks: 53.22 (5.96) |
| **Physical function** | | | | | | |
| **Activities of daily living** | | | | | | |
| Tse, 2010   (42)  China (Hong Kong)    MMAT: 4 | Mixed methods: quasi experimental  *Not Referred* | Modified Barthel Index, higher is better | Indoor gardening sessions (n = 26) | 8 weeks (end of intervention)  Mean (SD)  Baseline: 107.19 (5.56)  8 weeks: 107.19 (5.56) | Mann-Whitney U-test  Baseline: p = 0.06  8 weeks: p = 0.06  ES not reported | Neither indoor gardening nor usual care improved activities of daily living, differences between arms were not significantly different. |
| Control: usual care (n = 27) | 8 weeks (end of intervention)  Mean (SD)  Baseline: 107.11 (2.39)  8 weeks: 107.11 (2.39) |
| **Cognitive function** | | | | | | |
| **Concentration** | | | | | | |
| Bassi et al 2018 (43)    Italy    MMAT: 4 | Quasi-experimental, crossover  *Not Referred* | Concentration | Indoor horticultural activity (n = 11) | Follow-up timepoint: NR (each activity cycle lasted 6 weeks, so potentially 12 weeks overall)  Mean scores could not be extracted | ES could not be extracted | Both type of activities improved concentration compared to baseline, but no significant difference between arms was found. |
| Indoor occupational activity (n = 11)  *Nb: 2 groups: Group 1 - horticulture then occupational activities (n = 4); Group 2 – occupational then horticultural activities (n = 7)* |

**Appendix 12: Effectiveness of horticultural interventions**

AES-I - Apathy Evaluation Scale-informant version; BI – Barthel Index; GDS - Geriatric Depression Scale; GEE - Generalised estimating equation; LSNS - Luben Social Network Scale (LSNS); MMSE – Mini-Mental State Examination; MoCA – Montreal Cognitive Assessment; NR – not reported; NS – not significant; PANAS – Positive and Negative Affect Scales; Q-LES-Q-SF - Quality of Life, Enjoyment, and Satisfaction Questionnaire Short Form; PSQI-T – Pittsburgh Sleep Quality Index (Taiwanese version); QoL-AD – Quality of Life in Alzheimer’s disease scale; RCT – randomised controlled trial; SAS – Zung Self-Rating Anxiety Scale; SDS – Zung Self-Rating Depression Scale; SF-12 12-Item Short Form Survey; SLS – Satisfaction with Life Scale; WEMWBS – Warwick-Edinburgh Mental Well-being Scale; WHO-5 - World Health Organization Well-Being Index.

| **Study**  Overall risk of bias | **Study design**  Referred/ not Referred | **Outcome definition** | **Intervention arm (number at follow-up)** | **Follow-up timepoint**  **Result per arm** | **Intervention effect: between group difference (where reported)** | **Summary conclusion** |
| --- | --- | --- | --- | --- | --- | --- |
| **Wellbeing and Quality of life** | | | | | | |
| **General well-being** | | | | | | |
| Lai et al 2018 (44)    China    MMAT: 3 | RCT  *Not Referred* | Personal well-being index, higher is better | Horticultural therapy (n = 45) | 12 weeks post intervention  NR | GEE analysis   - Group effect: b = -0.596 (95% CI: -4.903, 6.094), NS | In residential care home residents, neither horticultural therapy nor social activities improved personal well-being, differences between arms were not significantly different. |
| Social activities, without plants (n = 50) | 12 weeks post intervention  NR |
| Makizako et al 2019   (45)  Japan    MMAT: 2 | RCT  *Not Referred* | SF-12 physical health | Horticultural program (n = 26) | 6 months (immediately post-intervention)  Mean (SD) change from baseline:  -1.4 (8.4), NS | Multiple linear regression   - Group effect: NS   ES not reported | In community-dwelling older adults, neither horticulture, exercise, nor education (control) improved general wellbeing immediately post intervention (6 months) or at 1-year post-intervention. Differences between horticulture and exercise or control were not statistically significant. |
| Exercise (n = 27) | 6 months (immediately post-intervention)  Mean (SD) change from baseline:  5.5 (12.7), NS |
| Control: education (n = 28) | 6 months (immediately post-intervention)  Mean (SD) change from baseline:  1.7 (10.4), NS |
| Horticultural program (n = 20) | 1-year post-intervention  Mean (SD) change from baseline:  2.2 (9.0), NS | Multiple linear regression   - Group effect: NS   ES not reported |
| Exercise (n = 23) | 1-year post-intervention  Mean (SD) change from baseline:  -3.3 (17.3), NS |
| Control: education (n = 24) | 1-year post-intervention  Mean (SD) change from baseline:  -1.8 (10.9), NS |
| Okvat et al 2012 (46)    USA    MMAT: 2 | Mixed methods: Pilot RCT  *Not Referred* | Vitality subscale of Medical Outcomes Study (MOS) 36-item Short-Form Health Survey, higher is better | Traditional Community Gardening (TCG) (n=15-17) | Mean (SD)  Baseline: 4.62 (0.66)  Follow-up 9 weeks (immediately post-intervention): 4.34 (0.97) | All participants (including non-randomly assigned) N=50  MCG vs TCG (B representing adjusted mean difference):  B = 0.07, SE B = 0.22, β= 0.03, t-value= 0.30  MCG vs WL:  B = 0.13, SE B = 0.29, β= 0.06, t-value= 0.43  TCG vs WL:  B = 0.03, SE B = 0.24, β= 0.02, t-value= 0.14 | Neither traditional nor mindful community gardening had a significant effect on vitality compared with wait list control in older adults. |
| Mindful Gardening (MCG) (n=15-16) | Mean (SD)  Baseline: 4.48 (1.02)  Follow-up 9 weeks (immediately post-intervention): 4.28 (1.21) |
| Waitlist (WL) (n=10-11) | Mean (SD)  Baseline: 4.41 (0.96)  Follow-up 9 weeks (immediately post-intervention): 4.11 (1.00) |
| **Quality of Life** | | | | | | |
| Ng et al 2017 (51)    Singapore    MMAT: 2 | RCT    *Not Referred* | Satisfaction with Life Scale (SLS), higher is better | Horticultural program (n = 29) | No (changes in) mean (SD) scores presented at follow-up time points    Repeated-measures ANOVA (baseline, 3 months, 6 months) p=0.13 | Repeated measures ANOVA Time x Group Interaction: p = 0.64  ES not reported | Horticultural program did not significantly improve life satisfaction in older adults at 3 months (during the intervention) or 6 months (immediately post-intervention). There was no significant difference in life satisfaction compared with a waitlist control. |
| Control: waitlist (n = 30) |
| Yang et al 2022 (52)    China    MMAT: 5 | Pilot RCT  *Not Referred* | QoL-AD, higher is better | Horticultural therapy (n = 16) | Median (IQR)  Baseline 23.5 (5.0)  Immediate post-intervention 25.0 (8.0)  3 months post-intervention 24.0 (11.0)  *X*2 = 8.12, p= 0.017 | Immediately post-intervention: Z = -1.807, p = 0.071  3 months post intervention: Z = -0.991, p = 0.322  ES not reported | In nursing home residents living in a dementia care unit quality of life significantly improved in the horticultural therapy group compared to baseline. However, there was no significant difference compared with usual care immediately following intervention or 3 months post-intervention. |
| Control: usual care (n = 16) | Median (IQR)  Baseline 23.0 (3.0)  Immediate post-intervention 22.5 (6.0)  3 months post-intervention 23.0 (3.0)  *X*2 = 0.140, p= 0.932 |
| Okvat et al 2012 (46)    USA    MMAT: 2 | Mixed methods: Pilot RCT  *Not Referred* | Q-LES-Q-SF, higher is better | Traditional Community Gardening (TCG) (n=15-17) | Mean (SD)  Baseline: 69.43 (5.12)  Follow-up 9 weeks (immediately post-intervention): 65.95 (8.23) | All participants (including non-randomly assigned) N=50  MCG vs TCG (B represents adjusted mean difference): B = 2.35, SE B = 2.56, β= 0.13, t-value= 0.92  MCG vs WL: B = 1.76, SE B = 3.10, β= 0.10, t-value= 0.57  TCG vs WL: B = -1.88, SE B = 3.23, β= - 0.10, t-value= -0.58 | In older adults neither traditional nor mindful community gardening had a significant effect on quality of life compared with waiting list control. The difference between the two active interventions was also not statistically significant. |
| Mindful Gardening (MCG) (n=15-16) | Mean (SD)  Baseline: 61.44 (8.60)  Follow-up 9 weeks (immediately post-intervention): 62.78 (11.13) |
| Waitlist (WL) (n=10-11) | Mean (SD)  Baseline: 62.72 (9.30)  Follow-up 9 weeks (immediately post-intervention): 62.77 (8.38) |
| Shen et al 2022 (49)    Taiwan    MMAT: 4 | Single-arm before-after study  *Not Referred* | Satisfaction with life (SLS), higher is better | Horticultural activities (n = 24) | Mean (SD)  Week 1  Pre-intervention: 21.73 (5.59)  Post-intervention (1 hour): 27.68 (5.12) p<0.001  Week 2  Pre-intervention: 22.17 (7.12)  Post-intervention (1 hour): 27.38 (6.19) p<0.001  Week 3  Pre-intervention: 21.33 (6.78)  Post-intervention (1 hour): 27.33 (7.28) p<0.001  Week 4  Pre-intervention: 23.21 (3.84)  Post-intervention (1 hour): 30.00 (4.20) p<0.001  Week 5  Pre-intervention: 18.68 (5.78)  Post-intervention (1 hour): 29.68 (3.21) p<0.001  Week 6  Pre-intervention: 22.38 (5.97)  Post-intervention (1 hour): 30.54 (5.60) p<0.001 | N/A | In older adults recruited from residential facilities and adult day-care services horticultural activities were associated with significant improvements in satisfaction with life immediately following intervention. |
| **Mental wellbeing** | | | | | | |
| Makizako et al 2019   (45)  Japan    MMAT: 2 | RCT  *Not Referred* | SF-12 mental health | Horticultural program (n = 26) | 6 months (immediately post-intervention)  Mean (SD) change from baseline:  0.4 (10.7), NS | Multiple linear regression   - Group effect: NS   ES not reported | In community-dwelling older adults, neither horticulture, exercise, nor education (control) improved mental wellbeing immediately post intervention (6 months) or at 1-year post-intervention. Differences between horticulture and exercise or education control were not statistically significant. |
| Exercise (n = 27) | 6 months (immediately post-intervention)  Mean (SD) change from baseline:  0.6 (7.5), NS |
| Control: education (n = 28) | 6 months (immediately post-intervention)  Mean (SD) change from baseline:  -2.1 (7.3), NS |
| Horticultural program (n = 20) | 1-year post-intervention  Mean (SD) change from baseline:  -2.5 (7.9), NS | Multiple linear regression   - Group effect: NS   ES not reported |
| Exercise (n = 23) | 1-year post-intervention  Mean (SD) change from baseline:  0.3 (9.8), NS |
| Control: education (n = 24) | 1-year post-intervention  Mean (SD) change from baseline:  0.4 (6.9), NS |  |  |
| Ng et al 2017 (51)    Singapore    MMAT: 2 | RCT    *Not Referred* | Ryff’s Scales of Psychological Well-Being, higher is better | Horticultural program (n = 29) | No (changes in) mean (SD) scores presented at follow-up time points    Repeated-measures ANOVA (baseline, 3 months, 6 months) p=0.86 | Repeated measures ANOVA  Time x Group Interaction  p = 0.34    ES not reported | Horticultural program did not significantly improve psychological well-being at 3 months in older adults (during the intervention) or 6 months (immediately post-intervention). There was no significant difference in well-being compared with a waitlist control. |
| Control: waitlist (n = 30) |
| Okvat et al 2011 (46)    USA    MMAT: 3 | (Mixed methods) Quasi-experimental  *Not Referred* | WHO-5, higher is better | Horticultural therapy (n = 27) | Mean (SD)  Pre-test: 18.11 (4.25)  Post-test: 18.33 (3.23) | F = 0.13, p=0.72  ES not reported | In community dwelling older adults wellbeing scores (WHO-5) showed little change over time, and differences between horticultural therapy and waitlist control for were not significant. |
| Waitlist (n = 7) | Mean (SD)  Pre-test: 16.57 (5.32)  Post-test: 16.29 (5.71) |
| Shen et al 2022 (49)    Taiwan    MMAT: 4 | Single-arm before-after study  *Not Referred* | Mental Wellbeing (WEMWBS), higher scores are better | Horticultural activities (n = 24) | Mean (SD)  Week 1  Pre-intervention: 44.05 (10.77)  Post-intervention (1 hour): 62.23 (5.72) p<0.001  Week 2  Pre-intervention: 45.29 (12.09)  Post-intervention (1 hour): 62.79 (7.39) p<0.001  Week 3  Pre-intervention: 41.71 (12.01)  Post-intervention (1 hour): 58.96 (13.98) p<0.001  Week 4  Pre-intervention: 45.83 (7.76)  Post-intervention (1 hour): 64.83 (6.14) p<0.001  Week 5  Pre-intervention: 40.58 (14.15)  Post-intervention (1 hour): 65.54 (6.74)p<0.001  Week 6  Pre-intervention: 53.21 (13.89)  Post-intervention (1 hour): 65.17 (6.25) p<0.001 | N/A | In older adults recruited from residential facilities and adult day-care services horticultural activities was associated with significant improvements in mental wellbeing immediately following intervention. |
| Thomson et al 2020   (50)  UK    MMAT: 3 | Mixed methods: Single arm before-after study  *Referred* | UCL Museum Wellbeing Measure, higher is better | Combined programme integrating horticulture and creative, arts-based therapies (n = 20) | Mean (SD)  Baseline: 16.70 (6.42)  Follow-up 10 weeks (immediately post-intervention: 25.30 (4.58)  p<0.001 | N/A | In older adult mental health service users a combined 10-week programme of horticulture and art was associated with a significant improvement in wellbeing. |
| **Mental health** | | | | | | |
| **Depression** | | | | | | |
| Lai et al 2018 (44)  China    MMAT: 3 | RCT  *Not Referred* | GDS, higher is worse | Horticultural therapy (n = 45) | 12 weeks post intervention  NR | GEE analysis   - Time effect: b = -0.965 (95% CI: -2.326, 0.397), NS - Group effect: b = -0.151 (95% CI: -1.428, 1.126), NS - Interaction effect: b = -0.247 (95% CI: -1.120, 0.625), NS | In residential care home residents, neither horticultural therapy nor social activities significantly improved depression, differences between arms were not significantly different. |
| Social activities, without plants (n = 50) | 12 weeks post intervention  NR |
| Makizako et al 2019  (45)  Japan    MMAT: 2 | RCT  *Not Referred* | GDS-15 | Horticultural program (n = 26) | 6 months (immediately post-intervention)  Mean (SD) change from baseline:  -2.3 (2.4), p < 0.001 | Multiple linear regression   - Group effect: p = 0.744   ES not reported | In community-dwelling older adults, whilst there was improvement in depression for all arms immediately post intervention (6 months) and at 1-year post-intervention, there were no significant differences between a horticultural programme, exercise or education control. |
| Exercise (n = 27) | 6 months (immediately post-intervention)  Mean (SD) change from baseline:  -1.8 (2.8), p = 0.002 |
| Control: education (n = 28) | 6 months (immediately post-intervention)  Mean (SD) change from baseline:  -1.5 (2.3), p = 0.001 |
| Horticultural program (n = 20) | 1-year post-intervention  Mean (SD) change from baseline:  -2.4 (2.8), p<0.05 | Multiple linear regression   - Group effect: p = 0.741   ES not reported |
| Exercise (n = 23) | 1-year post-intervention  Mean (SD) change from baseline:  -1.8 (1.7), p<0.05 |
| Control: education (n = 24) | 1-year post-intervention  Mean (SD) change from baseline:  -1.7 (2.5), p<0.05 |
| Ng et al 2017 (51)  Singapore    MMAT: 2 | RCT    *Not Referred* | SDS, higher is worse | Horticultural program (n = 29) | Repeated-measures ANOVA (baseline, 3 months, 6 months) p=0.53 | Repeated measures ANOVA Time x Group Interaction: p = 0.68 | Horticultural program did not significantly improve depression in older adults at 3 months (during the intervention) or 6 months (immediately post-intervention), and there was no significant difference in depression compared with waitlist control. |
| Control: waitlist (n = 30) |
| **Anxiety** | | | | | | |
| Ng et al 2017 (51)  Singapore    MMAT: 2 | RCT    *Not Referred* | SAS, higher is worse | Horticultural program (n = 29) | Baseline Mean (SD): 26.00 (4.88)  6 months Mean (SD): 36.32 (4.91)  p < 0.001 | Repeated measures ANOVA Time x Group Interaction: p = 0.81 | Anxiety significantly improved at 6 months compared to baseline in both groups of older adults, but there was significant difference between the horticulture programme and waitlist control. |
| Control: waitlist (n = 30) | Baseline Mean (SD): 25.79 (5.07)  6 months Mean (SD): 34.21 (3.69)  p < 0.001 |
| **Positive Affect** | | | | | | |
| Okvat et al 2012 (46)  USA    MMAT: 2 | Mixed methods: Pilot RCT  *Not Referred* | PANAS, higher is better | Traditional Community Gardening (TCG) (n=15-17) | Mean (SD)  Baseline: 38.80 (4.56)  Follow-up 9 weeks (immediately post-intervention): 39.53 (5.70) | All participants (including non-randomly assigned) N=50  MCG vs TCG: B = -0.87, SE B = 1.54, β = -.09, t-value = -0.57  MCG vs WL: B = 1.74, SE B = 2.09, β = 0.19, t-value = 0.83  TCG vs WL: B = 1.36, SE B = 1.66, β = -0.14, t-value = 0.82 | In older adults neither traditional nor mindful community gardening showed significant improvements in positive affect compared with a wait list control. The difference between the two active interventions was also not statistically significant. |
| Mindful Gardening (MCG) (n=15-16) | Mean (SD)  Baseline: 36.00 (3.64)  Follow-up 9 weeks (immediately post-intervention): 38.13 (3.81) |
| Waitlist (WL) (n=10-11) | Mean (SD)  Baseline: 35.00 (6.25)  Follow-up 9 weeks (immediately post-intervention): 36.64 (4.32) |
| **Negative Affect** | | | | | | |
| Okvat et al 2012 (46)  USA    MMAT: 2 | Mixed methods: Pilot RCT  *Not Referred* | PANAS (negative), higher is worse | Traditional Community Gardening (TCG) (n=15-17) | Mean (SD)  Baseline: 17.76 (5.30)  Follow-up 9 weeks (immediately post-intervention): 16.88 (5.10) | All participants (including non-randomly assigned) N=50  MCG vs TCG: B = -0.29, SE B = 1.47, β = -0.03, t-value = -0.02  MCG vs WL: B = 0.26, SE B = 1.40, β = 0.03, t-value = 0.19  TCG vs WL: B = 0.52, SE B = 1.43, β = 0.05, t-value = 0.37 | In older adults neither traditional nor mindful community gardening showed significant improvements in negative affect compared with a wait list control. The difference between the two active interventions was also not statistically significant. |
| Mindful Gardening (MCG) (n=15-16) | Mean (SD)  Baseline: 18.87 (7.24)  Follow-up 9 weeks (immediately post-intervention): 17.33 (5.46) |
| Waitlist (WL) (n=10-11) | Mean (SD)  Baseline: 18.09 (4.78)  Follow-up 9 weeks (immediately post-intervention): 16.55 (5.66) |
| **Psychological** | | | | | | |
| **Self-efficacy** | | | | | | |
| Perkins et al 2011 (47)  China    MMAT: 3 | RCT  *Not Referred* | General self-efficacy scale | Horticultural therapy (n = 45) | 12 weeks post intervention  NR | GEE analysis   - Time effect: b = 1.242 (95% CI: -1.895, 4.379), NS - Group effect: b = -0.245 (95% CI: -2.749, 2.259), NS - Interaction effect: b = 0.481 (95% CI: -1.409, 2.371), NS | In residential care home residents, neither horticultural therapy nor social activities improved self-efficacy, differences between arms were not significantly different. |
| Social activities, without plants (n = 50) | 12 weeks post intervention  NR |
| Perkins et al 2011 (47)  USA    MMAT: 3 | Quasi-experimental  *Not Referred* | Total Garden Knowledge questionnaire | Horticultural therapy (n = 27) | Mean (SD)  Pre-test: 7.19 (2.25)  Post-test: 10.48 (3.39) | F = 4.52, **p = 0.04** | In community dwelling older adults self-efficacy as measured by garden knowledge significantly improved following horticultural therapy compared to waitlist control. |
| Waitlist (n = 7) | Mean (SD)  Pre-test: 7.86 (1.57)  Post-test: 8.29 (1.60) |
| Total Garden Experience questionnaire | Horticultural therapy (n = 27) | Mean (SD)  Pre-test: 12.33 (4.12)  Post-test: 14.07 (4.48) | F = 1.32, p = 0.25 | In community dwelling older adults self-efficacy as measured by garden experience increased following horticultural therapy intervention, however there was no significant difference compared with waitlist control. |
| Waitlist (n = 7) | Mean (SD)  Pre-test: 12.14 (2.80)  Post-test: 11.86 (2.73) |
| **Self-esteem** | | | | | | |
| Perkins et al 2011 (47)  USA    MMAT: 3 | Quasi-experimental  *Not Referred* | Rosenberg’s self-esteem scale, higher is better | Horticultural therapy (n = 27) | Mean (SD)  Pre-test: 22.31 (3.91)  Post-test: 23.23 (3.88) | F = 5.04, **p = 0.032** | In community dwelling older adults self-esteem significantly improved with horticultural therapy compared to waitlist control. |
| Waitlist (n = 7) | Mean (SD)  Pre-test: 21.71 (3.64)  Post-test: 19.57 (2.30) |
| **Social** | | | | | | |
| **Social engagement** | | | | | | |
| Ng et al 2017 (51)  China    MMAT: 3 | RCT  *Not Referred* | Social engagement scale, higher is better | Horticultural therapy (n = 45) | 12 weeks post intervention  NR | GEE analysis   - Time effect: b = -0.041 (95% CI: -0.532, 0.451), NS - Group effect: b = -0.149 (95% CI: -0.498, 0.200), NS - Interaction effect: b = 0.090 (95% CI: -0.224, 0.403), NS | In residential care home residents, neither horticultural therapy nor social activities improved social engagement, differences between arms were not significantly different. |
| Social activities, without plants (n = 50) | 12 weeks post intervention  NR |
| Perkins et al 2011 (47)  USA    MMAT: 3 | Quasi-experimental  *Not Referred* | Social interaction - The Friendship Scale | Horticultural therapy (n = 27) | Mean (SD)  Pre-test: 20.07 (3.45)  Post-test: 19.63 (3.44) | F = 0.52, p = 0.48 | In community dwelling older adults horticultural therapy did not have a significant effect on social interaction compared to waitlist control. |
| Waitlist (n = 7) | Mean (SD)  Pre-test: 19.00 (3.32)  Post-test: 19.43 (2.15) |
| **Social network** | | | | | | |
| Lai et al 2018 (44)  China    MMAT: 3 | RCT  *Not Referred* | Luben Social Network Scale (LSNS), higher is better | Horticultural therapy (n = 45) | 12 weeks post intervention  NR | GEE analysis   - Time effect: b = 1.507 (95% CI: -1.771, 4.786), NS - Group effect: b = 0.170 (95% CI: -2.539, 2.880), NS - Interaction effect: b = 0.899 (95% CI: -1.115, 2.913), NS | In residential care home residents, neither horticultural therapy nor social activities improved individuals’ social networks, differences between arms were not significantly different. |
| Social activities, without plants (n = 50) | 12 weeks post intervention  NR |
| Makizako et al 2019  (45)  Japan    MMAT: 2 | RCT  *Not Referred* | LSNS abbreviated scale (LSNS-6), higher is better | Horticultural program (n = 26) | 6 months (immediately post-intervention)  Mean (SD) change from baseline: -0.0 (5.3), NS | Multiple linear regression   - Group effect: NR | In community-dwelling older adults, neither horticulture, exercise, nor education (control) improved social networking immediately post intervention (6 months) or at 1-year post-intervention. Differences were not statistically significant differences between arms. |
| Exercise (n = 27) | 6 months (immediately post-intervention)  Mean (SD) change from baseline: -0.6 (3.7), NS |
| Control: education (n = 28) | 6 months (immediately post-intervention)  Mean (SD) change from baseline: 0.4 (3.8), NS |
| Horticultural program (n = 20) | 1-year post-intervention  Mean (SD) change from baseline: 2.5 (5.7), NS | Multiple linear regression   - Group effect: NS   ES not reported |
| Exercise (n = 23) | 1-year post-intervention  Mean (SD) change from baseline: 3.8 (4.9), NS |
| Control: education (n = 24) | 1-year post-intervention  Mean (SD) change from baseline: 2.5 (4.7), NS |
| Ng et al 2017 (51)  Singapore    MMAT: 2 | RCT    *Not Referred* | Positive Relations with Others (sub scale of Ryff’s Scales of Psychological Well-being), higher is better | Horticultural program (n = 29) | 6 months (immediately post-intervention)  Mean (SD) change from baseline: 2.14 (95% CI: 0.52 to 3.76), p=0.001 | Repeated measures ANOVA Time x Group Interaction:  **p < 0.001**  ES not reported | Positive relations with others improved immediately following horticultural intervention in older adults, with the difference statistically significant compared to waitlist control. |
| Control: waitlist (n = 30) | 6 months (immediately post-intervention)  Mean (SD) change from baseline: -0.7 (95% CI: -2.09 to 0.69), p=0.31 |
| Okvat et al 2012 (46)  USA    MMAT: 2 | Mixed methods: Pilot RCT  *Not Referred* | MOS Social Support Survey | Traditional Community Gardening (TCG) (n=15-17) | Mean (SD)  Baseline: 4.04 (0.95)  Follow-up 9 weeks (immediately post-intervention): 4.07 (0.73) | All participants (including non-randomly assigned) N=50  MCG vs TCG: B = -0.01, SE B = 0.25, β = -0.01, t-value = -0.06  MCG vs WL: B = 0.31, SE B = 0.27, β = 0.20, t-value = 1.15  TCG vs WL: B = 0.18, SE B = 0.26, β = 0.11, t-value = 0.70 | In older adults neither traditional nor mindful community gardening showed significant improvements in social support compared with a wait list control. The difference between the two active interventions was also not statistically significant. |
| Mindful Gardening (MCG) (n=15-16) | Mean (SD)  Baseline: 3.59 (0.77)  Follow-up 9 weeks (immediately post-intervention): 3.88 (0.82) |
| Waitlist (WL) (n=10-11) | Mean (SD)  Baseline: 4.06 (0.90)  Follow-up 9 weeks (immediately post-intervention): 3.88 (0.93) |
| Yao et al 2017 (48)  Taiwan    MMAT: 4 | Quasi-experimental  *Not Referred* | Interpersonal Intimacy Scale, higher is better | Horticultural therapy (n = 41) | Mean (SE)  Baseline: 44.49 (6.08)  Follow-up 8 weeks (immediately post-intervention): 48.39 (7.13)  p= 0.002 | F = 16.55, **p<0.001** | In nursing home residents interpersonal intimacy significantly increased following horticultural intervention compared to baseline and also compared with usual care. |
| Usual care (n = 44) | Mean (SE)  Baseline: 46.30 (7.57)  Follow-up 8 weeks (immediately post-intervention): 44.57 (3.30)  p= 0.116 |
| **Social functioning** | | | | | | |
| Makizako et al 2019 (45)  Japan    MMAT: 2 | RCT  *Not Referred* | SF-12 social health | Horticultural program (n = 26) | 6 months (immediately post-intervention)  Mean (SD) change from baseline:  -2.9 (11.0), NS | Multiple linear regression   - Group effect: NS   ES not reported | In community-dwelling older adults, neither horticulture, exercise, nor education (control) improved social functioning immediately post intervention (6 months) or at 1-year post-intervention, nor were significant differences between arms observed. |
| Exercise (n = 27) | 6 months (immediately post-intervention)  Mean (SD) change from baseline:   -0.7 (12.3), NS |
| Control: education (n = 28) | 6 months (immediately post-intervention)  Mean (SD) change from baseline:  -2.3 (12.3), NS |
| Horticultural program (n = 20) | 1-year post-intervention  Mean (SD) change from baseline:  5.6 (10.1), NS | Multiple linear regression   - Group effect: NS   ES not reported |
| Exercise (n = 23) | 1-year post-intervention  Mean (SD) change from baseline:  1.3 (14.3), NS |
| Control: education (n = 24) | 1-year post-intervention  Mean (SD) change from baseline:  3.5 (10.3), NS |
| **Spiritual** | | | | | | |
| **Meaning of life** | | | | | | |
| Yao et al 2017 (48)  Taiwan    MMAT: 4 | Quasi-experimental  *Not Referred* | Meaning of Life Scale, higher is better | Horticultural therapy (n = 41) | Mean (SE)  Baseline: 74.49 (4.89)  Follow-up 8 weeks (immediately post-intervention): 76.61 (4.31)  p= 0.002 | F = 0.11, p = 0.738 | In nursing home residents meaning of life significantly increased in both groups, however there was no significant difference between horticulture therapy and usual care. |
| Usual care (n = 44) | Mean (SE)  Baseline: 73.89 (7.03)  Follow-up 8 weeks (immediately post-intervention): 76.07 (2.82)  p= 0.045 |
| **Physical activity** | | | | | | |
| **Physical activity measures (self-report or objective)** | | | | | | |
| Makizako et al 2019 (45)  Japan    MMAT: 2 | RCT  *Not Referred* | Daily steps, steps/day | Horticultural program (n = 26) | 6 months (immediately post-intervention)  Mean (SD) change from baseline:  -132.2 (1677.9), NS | Multiple linear regression   - Group effect: NS   ES not reported | In community-dwelling older adults, neither a horticultural program, exercise, nor control (education) improved daily steps at 6 months (immediately post-intervention), differences between arms were not significantly different.  At 1-year post intervention, however, a significant group difference was seen, with the horticultural group having decreased daily steps. |
| Exercise (n = 27) | 6 months (immediately post-intervention)  Mean (SD) change from baseline:  834.1 (2030.5), NS |
| Control: education (n = 28) | 6 months (immediately post-intervention)  Mean (SD) change from baseline:  332.7 (2206.5), NS |
| Horticultural program (n = 20) | 1-year post-intervention  Mean (SD) change from baseline:  -805.5 (1871.6), p<0.05 | Multiple linear regression   - Group effect: **p<0.05** - Exercise vs control: NS - Horticulture vs control: **p<0.05**   ES not reported |
| Exercise (n = 23) | 1-year post-intervention  Mean (SD) change from baseline:  583.0 (2379.7), NS |
| Control: education (n = 24) | 1-year post-intervention  Mean (SD) change from baseline:  229 (1989.0), NS |
| Makizako et al 2019  (45)  Japan    MMAT: 2 | RCT  *Not Referred* | Moderate physical activity, min/day | Horticultural program (n = 26) | 6 months (immediately post-intervention)  Mean (SD) change from baseline:  -2.8 (20.1), NS | Multiple linear regression   - Group effect: NS   ES not reported | In community-dwelling older adults, the horticultural programme did not increase physical activity (even seems to be associated with a small non-significant decline), and no significant differences between horticulture, exercise or education were found immediately post intervention (6 months) or at 1-year post-intervention. |
| Exercise (n = 27) | 6 months (immediately post-intervention)  Mean (SD) change from baseline:  6.6 (18.4), NS |
| Control: education (n = 28) | 6 months (immediately post-intervention)  Mean (SD) change from baseline:  7.5 (30.2), NS |
| Horticultural program (n = 20) | 1-year post-intervention  Mean (SD) change from baseline:  -7.6 (18.5), NS | Multiple linear regression   - Group effect: NS   ES not reported |
| Exercise (n = 23) | 1-year post-intervention  Mean (SD) change from baseline:  2.6 (19.9), NS |
| Control: education (n = 24) | 1-year post-intervention  Mean (SD) change from baseline:  8.7 (28.6), NS |
| **Physical function** | | | | | | |
| **Physical function (self-report or objective)** | | | | | | |
| Makizako et al 2019  (45)  Japan    MMAT: 2 | RCT  *Not Referred* | 2-minute walk test, m | Horticultural program (n = 26) | 6 months (immediately post-intervention)  Mean (SD) change from baseline:  -1.9 (16.6), NS | Multiple linear regression   - Group effect:**p = 0.016** - Exercise vs control: **p = 0.001** - Horticulture vs control: NS   ES not reported | In community-dwelling older adults, there were significant group differences for 2-minute walk test immediately post intervention (6 months), this appears to be a result of exercise leading to larger improvement in 2-minute walking performance compared to education control. No significant improvement in the horticultural group was seen. At 1-year post-intervention no differences were seen between groups. |
| Exercise (n = 27) | 6 months (immediately post-intervention)  Mean (SD) change from baseline:  8.3 (16.1), p < 0.05 |
| Control: education (n = 28) | 6 months (immediately post-intervention)  Mean (SD) change from baseline:  -3.6 (13.1), NS |  |  |
| Horticultural program (n = 20) | 1-year post-intervention  Mean (SD) change from baseline:  3.5 (16.6), NS | Multiple linear regression   - Group effect: p = 0.741   ES not reported |
| Exercise (n = 23) | 1-year post-intervention  Mean (SD) change from baseline:  8.4 (17.3), NS |
| Control: education (n = 24) | 1-year post-intervention  Mean (SD) change from baseline:  1.4 (14.1), NS |
| Makizako et al 2019  (45)  Japan    MMAT: 2 | RCT  *Not Referred* | Life space assessment of functional mobility, higher is better | Horticultural program (n = 26) | 6 months (immediately post-intervention)  Mean (SD) change from baseline:  -4.4 (15.6), NS | Multiple linear regression   - Group effect: NS   ES not reported | In community-dwelling older adults, the horticultural programme did not improve functional mobility (even seems to be associated with a non-significant decline), and no significant differences between horticulture, exercise or education control were found immediately post intervention (6 months) or at 1-year post-intervention. |
| Exercise (n = 27) | 6 months (immediately post-intervention)  Mean (SD) change from baseline:  -0.5 (19.2), NS |
| Control: education (n = 28) | 6 months (immediately post-intervention)  Mean (SD) change from baseline:  -12.0 (19.5), NS |
| Horticultural program (n = 20) | 1-year post-intervention  Mean (SD) change from baseline:  -9.6 (20.6), NS | Multiple linear regression   - Group effect: NS   ES not reported |
| Exercise (n = 23) | 1-year post-intervention  Mean (SD) change from baseline:  2.7 (19.7), NS |
| Control: education (n = 24) | 1-year post-intervention  Mean (SD) change from baseline:  -14.4 (29.7), NS |
| Yang et al 2022 (52)  China    MMAT: 5 | Pilot RCT  *Not Referred* | Functional capacity (BI), higher is better | Horticultural therapy (n = 16) | Median (IQR)  Baseline 72.5 (31.0)  Immediate post-intervention 72.5 (40.0)  3 months post-intervention 67.5 (41.0)  *X*2 = 0.311, p= 0.856 | Immediately post-intervention: Z = -0.586, p = 0.558  3 months post intervention:  Z = -0.586, p = 0.558 | In nursing home residents living in a dementia care unit neither horticultural intervention nor control (usual care) had a significant effect on functional capacity, and there was no significant difference between groups. |
| Control: usual care (n = 16) | Median (IQR)  Baseline 72.5 (51.0)  Immediate post-intervention 65.0 (29.0)  3 months post-intervention 62.5 (23.0)  *X*2 = 1.676, p= 0.433 |
| **Activities of daily living** | | | | | | |
| Yao et al 2017 (48)  Taiwan    MMAT: 4 | Quasi-experimental  *Not Referred* | Activities of Daily Living (BI), higher is better | Horticultural therapy (n = 41) | Mean (SE)  Baseline: 62.44 (25.30)  Follow-up 8 weeks (immediately post-intervention): 67.32 (25.40)  p= 0.048 | F = 11.89, **p = 0.001** | In nursing home residents activities of daily living significantly increased following horticultural therapy compared to baseline and the control group receiving usual care. |
| Usual care (n = 44) | Mean (SE)  Baseline: 65.57 (27.79)  Follow-up 8 weeks (immediately post-intervention): 62.05 (27.98)  p= 0.059 |
| **Cognitive function** | | | | | | |
| **General measures of cognitive function** | | | | | | |
| Ng et al 2017 (51)  Singapore    MMAT: 2 | RCT    *Not Referred* | MoCA, higher is better | Horticultural program (n = 29) | No (changes in) mean (SD) scores presented at follow-up time points.  Repeated-measures ANOVA (baseline, 3 months, 6 months): p=0.004 (no significant post-hoc) | Repeated measures ANOVA Time x Group Interaction: p = 0.13  ES not reported | Cognitive function significantly improved immediately post-intervention in older adults, but there was no significant difference between horticultural therapy and the waitlist control. |
| Control: waitlist (n = 30) |
| Yang et al 2022 (52)  China    MMAT: 5 | Pilot RCT  *Not Referred* | MMSE, higher is better | Horticultural therapy (n = 16) | Median (IQR)  Baseline: 9.5 (9.0)  Immediate post-intervention: 10.5 (13.0)  3 months post-intervention: 8.5 (10.0)  *X*2 = 9.16, p= 0.010 | Immediately post-intervention:  Z = -2.122, **p= 0.034**  3 months post intervention:  Z = -1.360, p= 0.174  ES not reported | In nursing home residents living in a dementia care unit, cognitive function significantly improved from baseline in both groups. There was no significant difference for horticultural therapy compared with usual care immediately following intervention or 3 months post-intervention. |
| Control: usual care (n = 16) | Median (IQR)  Baseline: 8.5 (8.0)  Immediate post-intervention: 7.0 (6.0)  3 months post-intervention: 5.5 (5.0)  *X*2 = 14.93, p= 0.001 |
| **Memory** | | | | | | |
| Makizako et al 2019  (45)  Japan    MMAT: 2 | RCT  *Not Referred* | Logical memory (immediate recall) | Horticultural program (n = 26) | 6 months (immediately post-intervention)  Mean (SD) change from baseline:  -0.1 (4.4), p = 0.836 | Multiple linear regression   - Group effect: **p < 0.001**   ES not reported | In community-dwelling older adults, there were significant between-group differences for logical memory (immediate recall) immediately post intervention (6 months) and at 1-year post-intervention. Whilst no post-hoc comparisons were conducted, only exercise showed significant improvement in logical memory (immediate recall) at both timepoints. |
| Exercise (n = 27) | 6 months (immediately post-intervention)  Mean (SD) change from baseline:  4.3 (4.7), **p < 0.001** |
| Control: education (n = 28) | 6 months (immediately post-intervention)  Mean (SD) change from baseline:  0.5 (5.2), p = 0.417 |
| Horticultural program (n = 20) | 1-year post-intervention  Mean (SD) change from baseline:  5.6 (10.1), NS | Multiple linear regression   - Group effect: **p = 0.014**   ES not reported |
| Exercise (n = 23) | 1-year post-intervention  Mean (SD) change from baseline:  3.9 (5.9), **p < 0.05** |
| Control: education (n = 24) | 1-year post-intervention  Mean (SD) change from baseline:  0.9 (6.1), NS |
| Makizako et al 2019  (45)  Japan    MMAT: 2 | RCT  *Not Referred* | Logical memory (delayed recall i.e. after 30 minutes) | Horticultural program (n = 26) | 6 months (immediately post-intervention)  Mean (SD) change from baseline:  1.1 (4.5), p = 0.091 | Multiple linear regression   - Group effect: **p < 0.007**   ES not reported | In community-dwelling older adults, there were significant group differences for logical memory (delayed recall) immediately post intervention (6 months), but not at 1-year post-intervention. Whilst no post-hoc comparisons were conducted, only exercise showed significant improvement in logical memory (immediate recall) immediately post intervention. |
| Exercise (n = 27) | 6 months (immediately post-intervention)  Mean (SD) change from baseline:  3.6 (5.2), **p = 0.001** |
| Control: education (n = 28) | 6 months (immediately post-intervention)  Mean (SD) change from baseline:  1.1 (4.7), p = 0.638 |
| Horticultural program (n = 20) | 1-year post-intervention  Mean (SD) change from baseline:  1.6 (5.1), NS | Multiple linear regression   - Group effect: p = 0.315   ES not reported |
| Exercise (n = 23) | 1-year post-intervention  Mean (SD) change from baseline:  4.4 (5.0), NS |
| Control: education (n = 24) | 1-year post-intervention  Mean (SD) change from baseline:  2.4 (4.7), NS |
| Okvat et al 2012 (46)  USA    MMAT: 2 | Mixed methods: Pilot RCT  *Not Referred* | Digit Span backwards (working memory) | Traditional Community Gardening (TCG) (n=15-17) | Mean (SD)  Baseline: 6.87 (2.39)  Follow-up 9 weeks (immediately post-intervention): 6.80 (2.21) | All participants (including non-randomly assigned) N=50  MCG vs TCG (B represents adjusted mean difference): B = 0.75, SE B = 0.56, β= 0.17, t-value= 1.35  MCG vs WL: B = 0.80, SE B = 0.62, β= 0.18, t-value = 1.31  TCG vs WL: B = -0.01, SE B = 0.69, β = -0.00, t-value = -0.01 | In older adults neither traditional nor mindful community gardening showed significant improvements in working memory compared with a wait list control. The difference between the two active interventions was also not statistically significant. |
| Mindful Gardening (MCG) (n=15-16) | Mean (SD)  Baseline: 7.60 (1.64)  Follow-up 9 weeks (immediately post-intervention): 8.07 (2.05) |
| Waitlist (WL) (n=10-11) | Mean (SD)  Baseline: 7.80 (2.15)  Follow-up 9 weeks (immediately post-intervention): 7.40 (2.50) |
| **Physiological/anthropometric** | | | | | | |
| **Sleep** | | | | | | |
| Shen et al 2022 (49)  Taiwan    MMAT: 4 | Single-arm before-after study  *Not Referred* | Sleep quality PSQI-T | Horticultural activities (n = 24) | Mean (SD)  Pre-intervention: 7.92 (3.75)  Post-intervention (6 weeks): 5.21 (3.60) p<0.01 | N/A | In older adults recruited from residential facilities and adult day-care services horticultural activities were associated with a significant improvement in sleep quality at the end of the 6-week intervention. |

**Figure 1: Logic model**


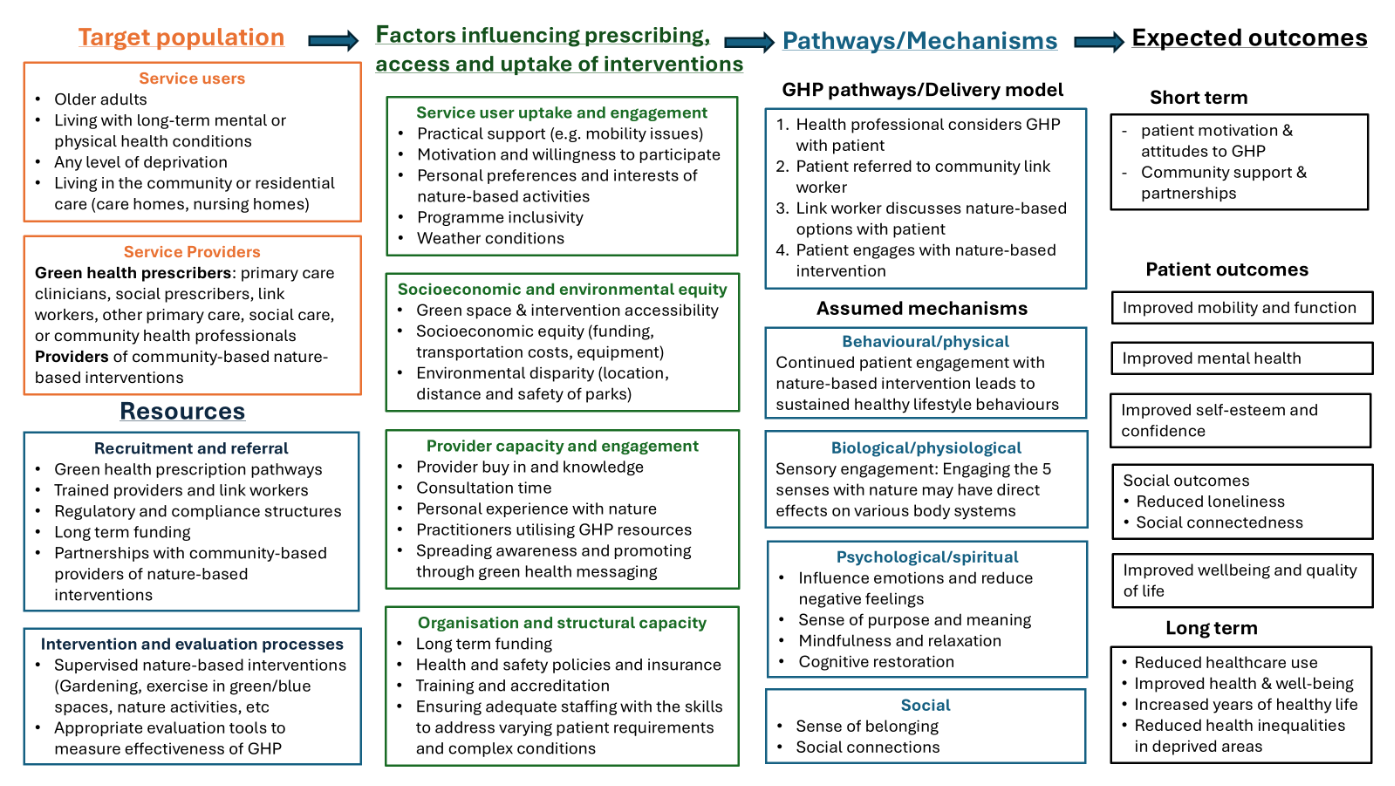

Supplement: Supplementary file 1 [file a9b09fa4eba9c280d8f9798c.docx]
